# Supplementary material for: Knowledge, perceptions and practices of pharmacists regarding generic substitution in China: a cross-sectional study
Source: PubMed Central journal article supplement — BMJ Open. 2021 Oct 17;11(10):e051277. doi: 10.1136/bmjopen-2021-051277 (PMC8524276; doi:10.1136/bmjopen-2021-051277), 2021-10-17
Supplement: bmjopen-2021-051277.draft_revisions.pdf [file bmjopen-2021-051277.draft_revisions.pdf]

# BMJ Open

BMJ Open is committed to open peer review. As part of this commitment we make the peer review history of every article we publish publicly available.

When an article is published we post the peer reviewers' comments and the authors' responses online. We also post the versions of the paper that were used during peer review. These are the versions that the peer review comments apply to.

The versions of the paper that follow are the versions that were submitted during the peer review process. They are not the versions of record or the final published versions. They should not be cited or distributed as the published version of this manuscript.

BMJ Open is an open access journal and the full, final, typeset and author-corrected version of record of the manuscript is available on our site with no access controls, subscription charges or pay-per-view fees (<http://bmjopen.bmj.com>).

If you have any questions on BMJ Open's open peer review process please email [info.bmjopen@bmj.com](mailto:info.bmjopen@bmj.com)

# BMJ Open

## Knowledge, perceptions, and practices of pharmacists regarding generic substitution in China: A cross-sectional study

|                               |                                                                                                                                                                                                                                                                                                                                                                                                                                                                                                                                                                                                                                                                                                                                                                                                                                                                                                                                                                                                                                                                                                                                                                                                                                                                                                                                                                                                                                                                                                                                                                                                                                                                                                                                                                                                                                                                                                                                                                                                                                                                                                                                                                                                                  |
|-------------------------------|------------------------------------------------------------------------------------------------------------------------------------------------------------------------------------------------------------------------------------------------------------------------------------------------------------------------------------------------------------------------------------------------------------------------------------------------------------------------------------------------------------------------------------------------------------------------------------------------------------------------------------------------------------------------------------------------------------------------------------------------------------------------------------------------------------------------------------------------------------------------------------------------------------------------------------------------------------------------------------------------------------------------------------------------------------------------------------------------------------------------------------------------------------------------------------------------------------------------------------------------------------------------------------------------------------------------------------------------------------------------------------------------------------------------------------------------------------------------------------------------------------------------------------------------------------------------------------------------------------------------------------------------------------------------------------------------------------------------------------------------------------------------------------------------------------------------------------------------------------------------------------------------------------------------------------------------------------------------------------------------------------------------------------------------------------------------------------------------------------------------------------------------------------------------------------------------------------------|
| Journal:                      | <i>BMJ Open</i>                                                                                                                                                                                                                                                                                                                                                                                                                                                                                                                                                                                                                                                                                                                                                                                                                                                                                                                                                                                                                                                                                                                                                                                                                                                                                                                                                                                                                                                                                                                                                                                                                                                                                                                                                                                                                                                                                                                                                                                                                                                                                                                                                                                                  |
| Manuscript ID                 | bmjopen-2021-051277                                                                                                                                                                                                                                                                                                                                                                                                                                                                                                                                                                                                                                                                                                                                                                                                                                                                                                                                                                                                                                                                                                                                                                                                                                                                                                                                                                                                                                                                                                                                                                                                                                                                                                                                                                                                                                                                                                                                                                                                                                                                                                                                                                                              |
| Article Type:                 | Original research                                                                                                                                                                                                                                                                                                                                                                                                                                                                                                                                                                                                                                                                                                                                                                                                                                                                                                                                                                                                                                                                                                                                                                                                                                                                                                                                                                                                                                                                                                                                                                                                                                                                                                                                                                                                                                                                                                                                                                                                                                                                                                                                                                                                |
| Date Submitted by the Author: | 17-Mar-2021                                                                                                                                                                                                                                                                                                                                                                                                                                                                                                                                                                                                                                                                                                                                                                                                                                                                                                                                                                                                                                                                                                                                                                                                                                                                                                                                                                                                                                                                                                                                                                                                                                                                                                                                                                                                                                                                                                                                                                                                                                                                                                                                                                                                      |
| Complete List of Authors:     | <p>Qu, Jinghan; State Key Laboratory of Complex Severe and Rare Diseases, Peking Union Medical College Hospital, Chinese Academy of Medical Sciences and Peking Union Medical College Hospital, Department of Pharmacy</p> <p>Zuo, Wei; State Key Laboratory of Complex Severe and Rare Diseases, Peking Union Medical College Hospital, Chinese Academy of Medical Sciences and Peking Union Medical College Hospital, Department of Pharmacy</p> <p>Wang, Shaohong; State Key Laboratory of Complex Severe and Rare Diseases, Peking Union Medical College Hospital, Chinese Academy of Medical Sciences and Peking Union Medical College Hospital, Department of Pharmacy</p> <p>Du, Liping; State Key Laboratory of Complex Severe and Rare Diseases, Peking Union Medical College Hospital, Chinese Academy of Medical Sciences and Peking Union Medical College Hospital, Department of Pharmacy</p> <p>Liu, Xin; State Key Laboratory of Complex Severe and Rare Diseases, Peking Union Medical College Hospital, Chinese Academy of Medical Sciences and Peking Union Medical College Hospital, Department of Pharmacy</p> <p>Gao, Yang; State Key Laboratory of Complex Severe and Rare Diseases, Peking Union Medical College Hospital, Chinese Academy of Medical Sciences and Peking Union Medical College Hospital, Department of Pharmacy</p> <p>Li, Jiantao; State Key Laboratory of Complex Severe and Rare Diseases, Peking Union Medical College Hospital, Chinese Academy of Medical Sciences and Peking Union Medical College Hospital, Department of Pharmacy</p> <p>Pan, Hui; Peking Union Medical College Hospital, Department of Medical Administration</p> <p>Du, Xiaoli; State Key Laboratory of Complex Severe and Rare Diseases, Peking Union Medical College Hospital, Chinese Academy of Medical Sciences and Peking Union Medical College Hospital, Department of Pharmacy</p> <p>Mei, Dan; State Key Laboratory of Complex Severe and Rare Diseases, Peking Union Medical College Hospital, Chinese Academy of Medical Sciences and Peking Union Medical College Hospital, Department of Pharmacy</p> <p>Took, Roxane; St. Louis College of Pharmacy, Department of Pharmacy</p> |

1  
2  
3  
4  
5  
6  
7  
8  
9  
10  
11  
12  
13  
14  
15  
16  
17  
18  
19  
20  
21  
22  
23  
24  
25  
26  
27  
28  
29  
30  
31  
32  
33  
34  
35  
36  
37  
38  
39  
40  
41  
42  
43  
44  
45  
46  
47  
48  
49  
50  
51  
52  
53  
54  
55  
56  
57  
58  
59  
60

|                  |                                                                                                                                                                                                                                                                                                                                                                                |
|------------------|--------------------------------------------------------------------------------------------------------------------------------------------------------------------------------------------------------------------------------------------------------------------------------------------------------------------------------------------------------------------------------|
|                  | <p>Practice<br/> Schafermeyer, Kenneth; St. Louis College of Pharmacy, Department of<br/> Pharmaceutical and Administrative Sciences<br/> Lukas, Stephanie; St. Louis College of Pharmacy, Department of<br/> Pharmaceutical and Administrative Sciences<br/> Zhang, Bo; Chinese Academy of Medical Sciences and Peking Union<br/> Medical College, Department of Pharmacy</p> |
| <p>Keywords:</p> | <p>EDUCATION &amp; TRAINING (see Medical Education &amp; Training), HEALTH<br/> ECONOMICS, Health policy &lt; HEALTH SERVICES ADMINISTRATION &amp;<br/> MANAGEMENT, PUBLIC HEALTH, QUALITATIVE RESEARCH</p>                                                                                                                                                                    |
|                  |                                                                                                                                                                                                                                                                                                                                                                                |

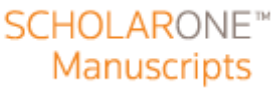

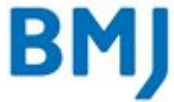

I, the Submitting Author has the right to grant and does grant on behalf of all authors of the Work (as defined in the below author licence), an exclusive licence and/or a non-exclusive licence for contributions from authors who are: i) UK Crown employees; ii) where BMJ has agreed a CC-BY licence shall apply, and/or iii) in accordance with the terms applicable for US Federal Government officers or employees acting as part of their official duties; on a worldwide, perpetual, irrevocable, royalty-free basis to BMJ Publishing Group Ltd ("BMJ") its licensees and where the relevant Journal is co-owned by BMJ to the co-owners of the Journal, to publish the Work in this journal and any other BMJ products and to exploit all rights, as set out in our [licence](#).

The Submitting Author accepts and understands that any supply made under these terms is made by BMJ to the Submitting Author unless you are acting as an employee on behalf of your employer or a postgraduate student of an affiliated institution which is paying any applicable article publishing charge ("APC") for Open Access articles. Where the Submitting Author wishes to make the Work available on an Open Access basis (and intends to pay the relevant APC), the terms of reuse of such Open Access shall be governed by a Creative Commons licence – details of these licences and which [Creative Commons](#) licence will apply to this Work are set out in our licence referred to above.

Other than as permitted in any relevant BMJ Author's Self Archiving Policies, I confirm this Work has not been accepted for publication elsewhere, is not being considered for publication elsewhere and does not duplicate material already published. I confirm all authors consent to publication of this Work and authorise the granting of this licence.

**Title Page****Title**

Knowledge, perceptions, and practices of pharmacists regarding generic substitution in China: A cross-sectional study

**Author**

Jinghan Qu<sup>1</sup>, Wei Zuo<sup>1</sup>, Shaohong Wang<sup>1</sup>, Liping Du<sup>1</sup>, Xin Liu<sup>1</sup>, Yang Gao<sup>1</sup>, Jiantao Li<sup>1</sup>, Hui Pan<sup>2</sup>, Xiaoli Du<sup>1</sup>, Dan Mei<sup>1</sup>, Roxane L. Took<sup>3</sup>, Kenneth W. Schafermeyer<sup>4</sup>, Stephanie Lukas<sup>4</sup>, Bo Zhang<sup>1</sup>

These authors contributed equally to this work.

**Author Affiliations**

1 Department of Pharmacy, State Key Laboratory of Complex Severe and Rare Diseases, Peking Union Medical College Hospital, Chinese Academy of Medical Sciences and Peking Union Medical College Hospital, Beijing, China

2 Department of Medical Administration, State Key Laboratory of Complex Severe and Rare Diseases, Peking Union Medical College Hospital, Chinese Academy of Medical Sciences and Peking Union Medical College Hospital, Beijing, China

3 Department of Pharmacy Practice, St. Louis College of Pharmacy, St. Louis, USA

4 Department of Pharmaceutical and Administrative Sciences, St. Louis College of Pharmacy, St. Louis, USA

**Corresponding author**

Bo Zhang. Email: zhangbopumch@163.com. Address: No.1 Shuaifuyuan Street, Dongcheng District, Beijing, China. Telephone numbers: 86-010-6527.

**Word count**

3842 words totally.

**Keywords**

Generic Substitution; Knowledge; Perceptions; Practices; Pharmacists

## Abstract

**Objective:** To evaluate pharmacists' knowledge, perceptions and practices towards generic substitution in the 11 pilot locations in China.

**Design:** An online cross-sectional survey using questionnaires was conducted. A convenience sampling technique was implemented to recruit pharmacists.

**Setting and participants:** The study took place in public and private hospitals of 11 pilot locations in China. 2291 pharmacists participated in the study.

**Results:** Most of the participants had good knowledge of requirements for evaluating the quality and efficacy of generic drugs (n=2118; 92.4%), and the definition of generic drugs (n=2078; 90.7%). In terms of perceptions, 67.3% of respondents believed generic drugs are equally as effective as the brand-name drugs, and 69.0% of respondents believed that generic drugs are as safe as brand equivalents. A high percentage of participants supported the policy of generic substitution (n=1634; 71.4%). A significant positive correlation was demonstrated between total knowledge score and total perception score ( $\rho=0.267$ ;  $P<0.001$ ). Efficacy, safety, and the direction of national policies and hospital regulations were the main factors affecting pharmacists' willingness to dispense generic drugs.

**Conclusions:** The study identified gaps in respondents' knowledge and perceptions of generic substitution. Pharmacists who are more knowledgeable in generic drugs tend to hold a more supportive attitude towards generic substitution. Although it appeared that pharmacists in China have largely accepted generic substitution, they still have concerns regarding the reliability and quality of generic drugs.

### Strengths and limitations of this study

- This cross-sectional study is one of the few surveys evaluating the knowledge, perceptions, and practices of pharmacists regarding generic drugs after implementing the national centralized procurement in China.
- This survey recruited a large number of respondents (n=2291). The Cronbach's alpha value for perceptions is equal to 0.833, indicating a good level of reliability.
- The web-based sample survey tool could be a limitation because of non-randomized sampling.
- This study was performed in 11 locations in China, which could limit generalizability of the findings.

## Introduction

Healthcare expenditures have been constantly increasing worldwide,<sup>[1,2]</sup> and drug spending is one of the fastest growing components of healthcare spending.<sup>[3-5]</sup> Generic drugs offer an opportunity for substantial savings to healthcare systems. Currently, generic drug prescribing has become a major cost-minimizing strategy to reduce the fiscal expenditures and financial burden to patients, and to increase accessibility of essential drugs globally. The World Health Organization defined a generic drug as “a pharmaceutical product, usually intended to be interchangeable with an innovator product that is manufactured without a license from the innovator company and marketed after the expiry date of the patent or other exclusive rights”.<sup>[6]</sup> Generic substitution is defined as the act of substituting a brand-name drug with an equivalent generic drug.<sup>[7]</sup>

In China, overall medical expenditures accounted for 6.57% of the gross domestic product (GDP) in 2018.<sup>[8]</sup> Approximately 28% of medical expenditures came from the government<sup>[8]</sup>. Overall medical expenditures in China steadily increased between 2008 and 2017, at an average annual rate of 12.2%, outpacing the real GDP growth of 8.1%.<sup>[9]</sup> The per-capita drug consumption in China has risen to the highest in the world.<sup>[10]</sup>

Controlling drug expenses in public hospitals is vital in controlling overall medical expenditures. According to Alexandra’s statistics,<sup>[11]</sup> due to the large volumes of medications consumed in public hospitals and a substantial price differential between the originator brand and lowest-priced generic products, 370 million U.S. dollars could be saved by switching only four drugs, saving patients an average of 65%. With the March 2019 implementation of the national centralized procurement program, generic substitution in China has become an irresistible trend.<sup>[12,13]</sup> This program directed by the authorities was a new procurement model for drugs based on volume and bidding, with public institutions forming a procurement alliance.

China has become the second largest producer of pharmaceuticals in the world and is still growing rapidly.<sup>[14,15]</sup> There are more than 8,135 pharmaceutical companies in China, most of which produce generic drugs. Ensuring that the large amounts of pharmaceutical products in the market are therapeutically equivalent has been challenging for Chinese authorities. Thus in 2013, the National Medical Products Administration (NMPA), formally known as the China Food and Drug Administration (CFDA), established a system to evaluate generic quality.<sup>[16]</sup> According to the regulations issued by the government in March 2016,<sup>[17]</sup> assessment of quality and efficacy via “consistency evaluation” is mandatory for generic drugs approved prior to 2007 in the National Essential Medicine List (2012). The NMPA requires that the 90% confidence interval of the geometric mean ratio for main pharmacokinetic parameters, the peak concentration (C<sub>max</sub>) and the area under concentration-time curve (AUC), of the product fall entirely within the range of 80.00%-125.00% in order to be bioequivalent.<sup>[18]</sup> By November 27, 2019, 323 drug products passed the consistency evaluation for quality and efficacy.<sup>[19]</sup> In the released NMPA standard reference product list, referenced products were selected from the brand equivalent or the same species acknowledged worldwide if the brand equivalent was not available.

The national centralized procurement program was approved by the State Council in January 2019 to significantly lower drug prices and to improve accessibility of drugs. Four municipalities and seven local cities were selected as the pilot cities, including Beijing, Tianjin, Shanghai, Chongqing, Shenyang, Dalian, Xiamen, Guangzhou, Shenzhen, Chengdu, Xi-an. Twenty-five drug products were selected in the pilot program, of which 22 were generic drugs that had previously passed the consistency evaluation and 3 were brand-name drugs. Drug manufacturers bid to be contracted in this pilot program, and the successful manufacturers established a contract with an agreed upon purchase amount. By setting up this contract, the drug purchase price dropped dramatically. By the end of 2019, the pilot program was extended to more cities and provinces forming a procurement alliance, which covered nearly all the Chinese mainland. The generic substitution policy evolved from this pilot; because more generic drugs cheaper than the originator brand went into the procurement program under the bidding mechanism and made up a large market share.

As essential members of health care system, pharmacists play an important role in spreading awareness about the generic substitution policy. The primary objective of this study was to investigate the knowledge, perceptions, and practices of Chinese pharmacists regarding generic substitution after completion of the pilot year.

## Methods

### Study design

A self-administered, anonymous, online cross-sectional survey was conducted in the 11 pilot locations in China between April and May 2020.

### Questionnaire design

The 29-item questionnaire was developed and distributed in the Chinese language. The preliminary version of the questionnaire was peer-reviewed by 7 researchers, and assessed by 10 experts for appropriateness of clinical terminology, completeness, accuracy and logical sequence of the statements. The final questionnaire was piloted among a sample of 20 pharmacists to test the reliability and validity of the questionnaire. The data of the pilot were not included in the final study's statistical analysis. Surveys questions were created in the Wenjuanxing website and was divided into four sections (demographic information, knowledge about generic drugs, perceptions towards generic substitution and practices on generic substitution).

### Demographic information

The first section assessed pharmacists' demographic data including respondents' age, gender, terminal degree, professional title, years in practice, secondary department (e.g., outpatient, inpatient, clinical, laboratory, etc.), and geographical location.

### Knowledge about generic drugs

The second section contained five questions evaluating pharmacists' knowledge of the consistency evaluation for generic drugs and national policies related to the national centralized procurement program. For knowledge-based questions, respondents self-assessed their level of knowledge on these 3 questions by indicating either "yes", "no" or "unsure". Response of "yes" were given 1 point, and responses of "no" or "unsure" were scored zero. For true or false questions, correct responses were given 1 point, and a wrong or unsure response was scored zero. The maximum score on this knowledge section was 5 points.

### Perceptions towards generic substitution

The third section explored pharmacists' perception of generic substitution with 10 items; a five-point Likert scale was used to measure the level of respondents' agreement with offered statements. Response of strong disagreement was given 1 point and strong agreement was given 5 point. For statistical reasons, the fifth question was reverse scored from 1(strong agreement) to 5 point (strong disagreement).

### Practices on generic substitution

In the fourth section, the practices, influencing factors, and difficulties related to generic substitution were examined. This section contained 5 multiple choice questions. For the last four questions, respondents were asked to select the top 3 important items.

### Data collection

On April 14th, 2020, the Wenjuanxing hyperlink for this survey was shared with pharmacist groups in the 11 pilot locations in China using WeChat, a multipurpose messaging app. Informed consent from all respondents was gained prior to the commencement of the questionnaire. In order to submit the questionnaire, Respondents had to complete all fields. Respondents were given approximately three weeks to complete the survey. The online survey was closed on May 6, 2020. Data from the survey were synchronously collected using Wenjuanxing website as soon as each respondent had finished the questionnaire.

### Patient and public involvement

Patients and/or public were not involved in this research.

### Statistical analysis

Data were analyzed with SPSS version 24. Normality of the data was tested using Kolmogorov-Smirnov test. If the data did not comply with the normal distribution, Mann-Whitney-U or Kruskal-Wallis tests were used to compare differences and Spearman's rank correlation was applied to determine associations among variables. *P*-values < 0.05 were considered significant.



## Results

### Demographics of respondents

We screened data for pharmacists only, and data from other professionals were excluded. A total of 2,291 pharmacists participated in the study. Nearly half of respondents (1,130; 49.3%) were in the age group of 30 to 39 years, and about a quarter of respondents (530; 23.1%) were in the group of 40 to 49 years. The majority of respondents 1,658 (72.4%) were female. The majority of pharmacists worked in a tertiary hospital setting (1,913; 83.5%) and had a bachelor's degree (1,487; 64.9%). 442 (19.3%) of the respondents were senior pharmacists, 928 (40.5%) of the respondents were pharmacists-in-charge, and 867 (37.8%) were primary pharmacists. More details regarding the demographic and professional characteristics are presented in Table 1.

For peer review only

**Table 1 Comparison of the total score of knowledge and perceptions across demographic characteristics.**

| Characteristics        | Frequency (%)<br>Total N=2291 | Total score of<br>knowledge<br>(Mean ± SD) | P-value*                 | Total score of<br>perceptions<br>(Mean ± SD) | P-value*                 |
|------------------------|-------------------------------|--------------------------------------------|--------------------------|----------------------------------------------|--------------------------|
| <b>Age(y)</b>          |                               |                                            |                          |                                              |                          |
| 20-29                  | 377 (16.5)                    | 3.50 ± 0.984                               |                          | 36.85 ± 4.612                                |                          |
| 30-39                  | 1130 (49.3)                   | 3.53 ± 0.989                               |                          | 37.10 ± 4.510                                |                          |
| 40-49                  | 530 (23.1)                    | 3.71 ± 0.910                               | <b>0.000</b>             | 37.01 ± 4.527                                | 0.349                    |
| 50-59                  | 244 (10.7)                    | 3.68 ± 0.819                               |                          | 37.39 ± 4.257                                |                          |
| ≥60                    | 10 (0.4)                      | 3.60 ± 0.966                               |                          | 37.30 ± 4.547                                |                          |
| <b>Gender</b>          |                               |                                            |                          |                                              |                          |
| Male                   | 633 (27.6)                    | 3.66 ± 0.885                               | <b>0.011<sup>a</sup></b> | 37.61 ± 4.688                                | <b>0.000<sup>a</sup></b> |
| Female                 | 1658 (72.4)                   | 3.55 ± 0.980                               |                          | 36.86 ± 4.415                                |                          |
| <b>Terminal degree</b> |                               |                                            |                          |                                              |                          |
| PhD                    | 81 (3.5)                      | 3.75 ± 0.783                               | <b>0.002</b>             | 35.96 ± 5.009                                | 0.057                    |
| Master                 | 460 (20.1)                    | 3.75 ± 0.849                               |                          | 36.77 ± 4.269                                |                          |

|                            |             |              |              |               |       |
|----------------------------|-------------|--------------|--------------|---------------|-------|
| Bachelor                   | 1487 (64.9) | 3.54 ± 0.973 |              | 37.23 ± 4.567 |       |
| Others                     | 263 (11.5)  | 3.47 ± 1.044 |              | 36.98 ± 4.319 |       |
| <b>Professional title</b>  |             |              |              |               |       |
| Chief pharmacist           | 143 (6.2)   | 3.90 ± 0.799 |              | 37.27 ± 4.344 |       |
| Associate chief pharmacist | 299 (13.1)  | 3.75 ± 0.806 |              | 36.93 ± 4.334 |       |
| Pharmacist in charge       | 928 (40.5)  | 3.61 ± 0.879 |              | 37.07 ± 4.476 |       |
|                            |             |              | <b>0.000</b> |               | 0.897 |
| Pharmacist                 | 867 (37.8)  | 3.44 ± 1.077 |              | 37.09 ± 4.607 |       |
| No title (e.g. Intern)     | 50 (2.2)    | 3.48 ± 0.974 |              | 36.92 ± 4.844 |       |
| others                     | 4 (0.2)     | 4.00 ± 0.000 |              | 35.00 ± 3.162 |       |
| <b>Years in practice</b>   |             |              |              |               |       |
| Less than 5                | 424 (18.5)  | 3.56 ± 0.980 |              | 36.81 ± 4.436 |       |
| 6-10                       | 616 (26.9)  | 3.51 ± 0.971 |              | 37.24 ± 4.582 |       |
|                            |             |              | <b>0.008</b> |               | 0.417 |
| 11-20                      | 632 (27.6)  | 3.55 ± 0.996 |              | 37.02 ± 4.628 |       |
| 21-30                      | 424 (18.5)  | 3.70 ± 0.909 |              | 37.04 ± 4.304 |       |

|                                     |             |              |              |               |              |
|-------------------------------------|-------------|--------------|--------------|---------------|--------------|
| More than 30                        | 195 (8.5)   | 3.68 ± 0.787 |              | 37.27 ± 4.422 |              |
| <b>Level of medical institution</b> |             |              |              |               |              |
| Tertiary hospital                   | 1913 (83.5) | 3.60 ± 0.953 |              | 37.09 ± 4.493 |              |
| Secondary hospital                  | 254 (11.1)  | 3.45 ± 1.011 | 0.071        | 36.65 ± 4.425 | 0.148        |
| Community hospital                  | 27 (1.2)    | 3.48 ± 1.051 |              | 36.67 ± 4.812 |              |
| Primary health care institution     | 97 (4.2)    | 3.65 ± 0.817 |              | 37.89 ± 4.761 |              |
| <b>Location</b>                     |             |              |              |               |              |
| Beijing                             | 551 (24.1)  | 3.66 ± 0.903 |              | 37.52 ± 4.693 |              |
| Tianjin                             | 190 (8.3)   | 3.70 ± 0.902 |              | 37.55 ± 4.554 |              |
| Shanghai                            | 178 (7.8)   | 3.53 ± 1.037 |              | 36.02 ± 4.929 |              |
| Chongqing                           | 102 (4.5)   | 3.75 ± 0.875 | <b>0.000</b> | 36.45 ± 4.099 | <b>0.000</b> |
| Shenyang                            | 187 (8.2)   | 3.55 ± 0.911 |              | 37.19 ± 4.584 |              |
| Dalian                              | 261 (11.4)  | 3.62 ± 0.952 |              | 37.67 ± 4.488 |              |
| Xiamen                              | 90 (3.9)    | 3.69 ± 0.895 |              | 37.27 ± 4.292 |              |

1  
2  
3  
4  
5  
6  
7  
8  
9  
10  
11  
12  
13  
14  
15  
16  
17  
18  
19  
20  
21  
22  
23  
24  
25  
26  
27  
28  
29  
30  
31  
32  
33  
34  
35  
36  
37  
38  
39  
40  
41  
42  
43  
44  
45  
46

---

|           |            |              |               |
|-----------|------------|--------------|---------------|
| Guangzhou | 159 (6.9)  | 3.58 ± 0.957 | 36.23 ± 4.286 |
| Shenzhen  | 262 (11.4) | 3.51 ± 0.942 | 36.97 ± 4.754 |
| Chengdu   | 99 (4.3)   | 3.62 ± 0.765 | 36.86 ± 3.623 |
| Xi-an     | 212 (9.3)  | 3.26 ± 1.182 | 36.52 ± 3.683 |

---

Bold *P*-values represent statistical significance.  
 \**P*-value calculated using Kruskal-Wallis test.  
<sup>a</sup> *P*-value calculated using Mann-Whitney U test.

For peer review only

### Knowledge about generic drugs

Knowledge of generic drugs was tested in five questions (for a total of five points), and the median knowledge score was 4.00 (mean  $\pm$  SD: 3.58  $\pm$  0.956). However, Table 1 shows statistically significant differences in knowledge scores related to variances in demographic and professional characteristics. Pharmacists within the range of 40-49 years had the highest score of knowledge (mean  $\pm$  SD: 3.71  $\pm$  0.989), followed by those of 50-59 years (mean  $\pm$  SD: 3.68  $\pm$  0.819) and more than 60 years (mean  $\pm$  SD: 3.60  $\pm$  0.966). Men scored significantly higher than women (mean: 3.66 versus 3.55;  $P < 0.05$ ). Among different levels of terminal degrees and professional titles, pharmacists with doctoral degrees (mean  $\pm$  SD: 3.75  $\pm$  0.783) higher professional titles (mean  $\pm$  SD: 3.90  $\pm$  0.799) were more knowledgeable of generic drugs.

Table 2 represents pharmacists' responses to the knowledge items. The vast majority of the respondents understood that the government has carried out the program of consistency evaluation (2,118; 92.4%), and that generic drugs selected in the national centralized procurement program have passed the consistency evaluation (2,067; 90.2%). A high percentage of pharmacists (1,718; 75.0%) reported they were aware of how to identify generics that have passed consistency. However, only 225 (9.8%) pharmacists correctly identified the pharmacokinetic parameters to be assessed in determining bioequivalence per consistency evaluation. 2078 (90.7%) of pharmacists identified the correct definition of a generic drugs have the same active ingredients, dosage forms, routes of administration and therapeutic effects as the brand name drug. Associations between knowledge items and characteristics are displayed in the Supplementary file Table S1.

**Table 2 Pharmacists' knowledge about generic drugs.**

| Statement                                                                                                                                                                                                                                                                                                                              | Yes or Correct response<br>N (%) | No or Incorrect response<br>N (%) | Unsure<br>N (%) |
|----------------------------------------------------------------------------------------------------------------------------------------------------------------------------------------------------------------------------------------------------------------------------------------------------------------------------------------|----------------------------------|-----------------------------------|-----------------|
| Were you aware that China carries out the program of quality and efficacy consistency evaluation of generic drugs?                                                                                                                                                                                                                     | 2118 (92.4)                      | 74 (3.2)                          | 99 (4.3)        |
| Were you aware of the logo "Have passed the Consistency Evaluation" on the generic products?                                                                                                                                                                                                                                           | 1718 (75.0)                      | 320 (14.0)                        | 253 (11.0)      |
| True/False: In principle, the method of bioequivalence tests in vivo is used for Consistency Evaluation. The standard of bioequivalence is that the 90% confidence interval of the geometric mean experiment/ reference ratios for main pharmacokinetic parameters (Cmax and AUC) falls entirely within the range of 90.00% ~ 120.00%. | 225 (9.8)                        | 1666 (72.7)                       | 400 (17.5)      |
| Were you aware that all the generic drugs in national centralized procurement have passed the consistency evaluation of quality and efficacy?                                                                                                                                                                                          | 2067 (90.2)                      | 68 (3.0)                          | 156 (6.8)       |
| True/False: The generic drugs in the national centralized procurement have the same active ingredients, dosage forms, routes of administration and therapeutic effects with the brand drugs.                                                                                                                                           | 2078 (90.7)                      | 57 (2.5)                          | 156 (6.8)       |

### Perceptions towards generic substitution

Ten items were designed to assess attitudes on generic substitution, the median score was calculated to be 37.00 (mean  $\pm$  SD: 37.07  $\pm$  4.503). Men had a higher total perception score and thus more positive attitude regarding generic substitution ( $P < 0.001$ ; Table 1). Details on perceptions can be found in Table 3.

For peer review only



**Table 3 Pharmacists' perceptions towards generic drugs.**

| <b>Statement</b>                                                                                                                                               | <b>Strongly Agree N (%)</b> | <b>Agree N (%)</b> | <b>Neutral N (%)</b> | <b>Disagree N (%)</b> | <b>Strongly Disagree N (%)</b> |
|----------------------------------------------------------------------------------------------------------------------------------------------------------------|-----------------------------|--------------------|----------------------|-----------------------|--------------------------------|
| Generic drugs that have passed the consistency evaluation are as effective as brand-name equivalents.                                                          | 361 (15.8)                  | 1179 (51.5)        | 684 (29.9)           | 58 (2.5)              | 9 (0.4)                        |
| Generic drugs that have passed the consistency evaluation are as safe as brand-name equivalents.                                                               | 355 (15.5)                  | 1226 (53.5)        | 657 (28.7)           | 50 (2.2)              | 3 (0.1)                        |
| Generic drugs that have passed the consistency evaluation are less expensive than brand-name equivalents.                                                      | 1076 (47.0)                 | 987 (43.1)         | 218 (9.5)            | 10 (0.4)              | 0 (0.0)                        |
| Generic drugs that have passed the consistency evaluation are interchangeable with brand-name drugs.                                                           | 314 (13.7)                  | 1085 (47.4)        | 784 (34.2)           | 96 (4.2)              | 12 (0.5)                       |
| Replacing brand-name drugs with generic drugs that passed the consistency evaluation may change the clinical outcomes of medication treatment.                 | 189 (8.2)                   | 615 (26.8)         | 1047 (45.7)          | 387 (16.9)            | 53 (2.3)                       |
| Application of generic drugs that passed the consistency evaluation could improve adherence to medication treatment of patients.                               | 228 (10.0)                  | 873 (38.1)         | 1005 (43.9)          | 169 (7.4)             | 16 (0.7)                       |
| Health providers need to explain detailed information about generic drugs to patients in order to ensure that they correctly understand and use generic drugs. | 640 (27.9)                  | 1369 (59.8)        | 258 (11.3)           | 20 (0.9)              | 4 (0.2)                        |
| Generic drugs can be exempted from clinical trials for approval if they passed bioequivalence trials in vivo.                                                  | 191 (8.3)                   | 510 (22.3)         | 759 (33.1)           | 673 (29.4)            | 158 (6.9)                      |
| Relevant organizations should formulate and issue standard guidelines for generic substitution.                                                                | 661 (28.9)                  | 1312 (57.3)        | 296 (12.9)           | 20 (0.9)              | 2 (0.1)                        |
| I support the current policy of substituting brand-name drugs with generic                                                                                     | 409 (17.9)                  | 1225 (53.5)        | 619 (27.0)           | 32 (1.4)              | 6 (0.3)                        |

1  
2  
3  
4  
5  
6  
7  
8  
9  
10  
11  
12  
13  
14  
15  
16  
17  
18  
19  
20  
21  
22  
23  
24  
25  
26  
27  
28  
29  
30  
31  
32  
33  
34  
35  
36  
37  
38  
39  
40  
41  
42  
43  
44  
45  
46

---

drugs that have passed the consistency evaluation.

---

For peer review only

1  
2  
3 About two-thirds of the respondents agreed that generic drugs that passed the consistency  
4 evaluation were as efficacious (1,540; 67.3%) or as safe (1,581; 69.0%) as the brand-name  
5 equivalent. A total of 2,063 (90.1%) respondents reported that generic drugs have significant cost-  
6 minimizing advantages over the brand-name drugs. 1,399 (61.1%) pharmacists believed generic  
7 drugs that passed the consistency evaluation were interchangeable with the brand-name drugs; while  
8 784 (34.2%) pharmacists held a neutral attitude towards interchangeability. Furthermore, 804  
9 (35.0%) respondents believed that replacing the brand-name drugs with generic drugs may change  
10 clinical outcomes of medication treatment.

11  
12  
13 With regard to medication adherence, 1,101 (48.1%) respondents stated use of generic drugs  
14 could improve adherence to medication, but 1,005 (43.9%) respondents were neutral on this. A large  
15 percentage of respondents (2,009; 87.7%) recognized the importance of explaining detailed  
16 information about generic drugs to patients. While, a similar percentage of respondents (1,973;  
17 86.2%) highlighted the need for standard guidelines for generic substitution, 701 (30.6%) believed  
18 that drugs that pass bioequivalence trials *in vivo* should be exempted from additional clinical trials  
19 before marketing. 759 (33.1%) pharmacists were neutral about this, and 831 (36.3%) disagreed. A  
20 large number of participant pharmacists (1,634; 71.4%) supported the national policy of generic  
21 substitution. A statistically significant association was found between geographic location and  
22 supportive attitudes toward generic substitution ( $P < 0.001$ ), see Supplementary file Table S2. The  
23 highest percentage of pharmacists in favor of generic substitution were from Xiamen (78.9%),  
24 followed by Tianjin (77.4%) and Beijing (76.8%), while the lowest percentage were from Shanghai  
25 (53.3%) (see Supplementary file Table S3).

26  
27 A significant positive correlation was observed between pharmacists' perception on the  
28 efficacy and safety ( $\rho = 0.761$ ;  $P < 0.001$ ). The positive attitude towards either efficacy ( $\rho = 0.681$ ;  
29  $P < 0.001$ ) or safety ( $\rho = 0.640$ ;  $P < 0.001$ ) of generic drugs was associated with generic  
30 interchangeability. There were also significant associations between generic interchangeability and  
31 support for generic substitution ( $\rho = 0.602$ ;  $P < 0.001$ ). In addition, a significant positive correlation  
32 was demonstrated between total knowledge score and total perception score ( $\rho = 0.267$ ;  $P < 0.001$ ).

### 33 **Practices on generic substitution**

34  
35 A total of 1,850 (80.8%) pharmacists noted increased use of generic drugs in their medical  
36 institutions, of whom 1046 (45.7%) reported a dramatically increased trend. Table 4 illustrates  
37 possible influencing factors related to dispensing and selection of generic drugs; most pharmacist  
38 respondents reported that the three main factors affecting their willingness to dispense generic drugs  
39 were efficacy (25.0%), safety (19.2%), and the direction of national policies and hospital regulations  
40 (18.7%).

41  
42 Pharmacists reported that they think the top three factors patients considered when selecting  
43 generic drugs were efficacy of generic drugs (23.9%), preferences for brand-name drugs and  
44 medication habits (19.9%), and safety of generic drugs (17.4%). The most commonly cited  
45 difficulties in implementation of the centralized procurement and use of generic drugs were lack of  
46 trust in efficacy and safety (31.0%), challenge to change patients' preference (29.0%), and lack of  
47 time to provide patient education (23.6%). Suggestions for promoting generic substitution included  
48 encouraging generic substitution by health insurance policies (27.6%), publicizing these policies  
49 (25.5%), and educating health providers about generics and guidelines regarding their use (21.1%).  
50  
51  
52  
53  
54  
55  
56  
57  
58  
59  
60

**Table 4 Generic substitution practices.**

| Item                                                                                                                                                           | Statement                                                       | N (%)       |
|----------------------------------------------------------------------------------------------------------------------------------------------------------------|-----------------------------------------------------------------|-------------|
| How has the amount of generic drugs used in your medical institution changed after the implementation of national centralized procurement of drugs?            | Significantly increased                                         | 1046 (45.7) |
|                                                                                                                                                                | Increased somewhat                                              | 805 (35.1)  |
|                                                                                                                                                                | Basically unchanged                                             | 163 (7.1)   |
|                                                                                                                                                                | Decreased                                                       | 23 (1.0)    |
|                                                                                                                                                                | Unsure                                                          | 254 (11.1)  |
| What factors do you think affect the selection of generic drugs? Please select the top 3 important items.                                                      | National policies and hospital regulations                      | 1284 (18.7) |
|                                                                                                                                                                | Efficacy of generic drugs                                       | 1716 (25.0) |
|                                                                                                                                                                | Safety of generic drugs                                         | 1321 (19.2) |
|                                                                                                                                                                | Economy of generic drugs                                        | 686 (10.0)  |
|                                                                                                                                                                | Accessibility of generic drugs and brand-name drugs             | 350 (5.1)   |
|                                                                                                                                                                | Physicians' clinical expertise in medication treatment          | 324 (4.7)   |
|                                                                                                                                                                | Patient's financial burden                                      | 357 (5.2)   |
|                                                                                                                                                                | Patients' willingness and preferences                           | 548 (8.0)   |
|                                                                                                                                                                | Promotion of drug representatives                               | 94 (1.4)    |
|                                                                                                                                                                | Reputation of generic drugs manufacturers                       | 182 (2.6)   |
| What factors do you think affect patients' choice of selecting generic drugs in the national centralized procurement? Please select the top 3 important items. | Others                                                          | 11 (0.2)    |
|                                                                                                                                                                | Patients' preference for brand-name drugs and medication habits | 1368 (19.9) |
|                                                                                                                                                                | Efficacy of generic drugs                                       | 1641 (23.9) |
|                                                                                                                                                                | Safety of generic drugs                                         | 1198 (17.4) |
|                                                                                                                                                                | Out-of-pockets cost of drugs                                    | 737 (10.7)  |
|                                                                                                                                                                | Patient's financial burden                                      | 888 (12.9)  |
|                                                                                                                                                                | Physicians' suggestions                                         | 625 (9.1)   |
|                                                                                                                                                                | National policies                                               | 412 (6.0)   |
| Others                                                                                                                                                         | 4 (0.1)                                                         |             |

|    |                                                                                                                                                                    |                                                                                                                                              |             |
|----|--------------------------------------------------------------------------------------------------------------------------------------------------------------------|----------------------------------------------------------------------------------------------------------------------------------------------|-------------|
| 1  |                                                                                                                                                                    |                                                                                                                                              |             |
| 2  |                                                                                                                                                                    |                                                                                                                                              |             |
| 3  |                                                                                                                                                                    |                                                                                                                                              |             |
| 4  |                                                                                                                                                                    |                                                                                                                                              |             |
| 5  | What do you think is the largest challenge in implementing the national centralized procurement and use of generic drugs? Please select the top 3 important items. | There is no enough time to explain details to patients.                                                                                      | 1621 (23.6) |
| 6  |                                                                                                                                                                    | It is difficult to change patients' preference.                                                                                              | 1992 (29.0) |
| 7  |                                                                                                                                                                    | Lack of trust in the efficacy and safety of generic drugs.                                                                                   | 2134 (31.0) |
| 8  |                                                                                                                                                                    | There is an increased risk of errors in dispensing drugs.                                                                                    | 529 (7.7)   |
| 9  |                                                                                                                                                                    | There is an increased cost in maintenance and manpower.                                                                                      | 558 (8.1)   |
| 10 |                                                                                                                                                                    | Others                                                                                                                                       | 39 (0.6)    |
| 11 | What measures should be taken to promote the national centralized procurement and use of generic drugs? Please select the top 3 important items.                   | Encourage patients to use generic drugs by use of health insurance policies.                                                                 | 1899 (27.6) |
| 12 |                                                                                                                                                                    | Increase publicity of centralized procurement policies.                                                                                      | 1751 (25.5) |
| 13 |                                                                                                                                                                    | Educate health providers on centralized procurement policies and information about selected drugs.                                           | 1450 (21.1) |
| 14 |                                                                                                                                                                    | Medical institutions should restrict the use of the brand-name drugs with the same generic name, and retain only the selected generic drugs. | 513 (7.5)   |
| 15 |                                                                                                                                                                    | Medical institutions should restrict the use of all brand-name drugs with the same pharmacological action.                                   | 271 (3.9)   |
| 16 |                                                                                                                                                                    | Standard guidelines on generic substitution should be issued.                                                                                | 942 (13.7)  |
| 17 |                                                                                                                                                                    | Others                                                                                                                                       | 47 (0.7)    |
| 18 |                                                                                                                                                                    |                                                                                                                                              |             |
| 19 |                                                                                                                                                                    |                                                                                                                                              |             |
| 20 |                                                                                                                                                                    |                                                                                                                                              |             |
| 21 |                                                                                                                                                                    |                                                                                                                                              |             |
| 22 |                                                                                                                                                                    |                                                                                                                                              |             |
| 23 |                                                                                                                                                                    |                                                                                                                                              |             |
| 24 |                                                                                                                                                                    |                                                                                                                                              |             |
| 25 |                                                                                                                                                                    |                                                                                                                                              |             |
| 26 |                                                                                                                                                                    |                                                                                                                                              |             |
| 27 |                                                                                                                                                                    |                                                                                                                                              |             |
| 28 |                                                                                                                                                                    |                                                                                                                                              |             |
| 29 |                                                                                                                                                                    |                                                                                                                                              |             |
| 30 |                                                                                                                                                                    |                                                                                                                                              |             |
| 31 |                                                                                                                                                                    |                                                                                                                                              |             |
| 32 |                                                                                                                                                                    |                                                                                                                                              |             |
| 33 |                                                                                                                                                                    |                                                                                                                                              |             |
| 34 |                                                                                                                                                                    |                                                                                                                                              |             |
| 35 |                                                                                                                                                                    |                                                                                                                                              |             |
| 36 |                                                                                                                                                                    |                                                                                                                                              |             |
| 37 |                                                                                                                                                                    |                                                                                                                                              |             |
| 38 |                                                                                                                                                                    |                                                                                                                                              |             |
| 39 |                                                                                                                                                                    |                                                                                                                                              |             |
| 40 |                                                                                                                                                                    |                                                                                                                                              |             |
| 41 |                                                                                                                                                                    |                                                                                                                                              |             |
| 42 |                                                                                                                                                                    |                                                                                                                                              |             |
| 43 |                                                                                                                                                                    |                                                                                                                                              |             |
| 44 |                                                                                                                                                                    |                                                                                                                                              |             |
| 45 |                                                                                                                                                                    |                                                                                                                                              |             |
| 46 |                                                                                                                                                                    |                                                                                                                                              |             |

## Discussion

This cross-sectional study is one of the few surveys evaluating the knowledge, perceptions, and practices of pharmacists regarding generic drugs after implementing the national centralized procurement in China. The Cronbach's alpha value for perception is equal to 0.833, indicating a good level of reliability. This survey recruited a large number of respondents. In general, pharmacists had fair amount of knowledge regarding consistency evaluation and the definition of generic drugs. It appears that Chinese pharmacists are generally supportive of generic substitution; although, they still acknowledge some reservations regarding the quality, efficacy and safety of generic drugs. Measures such as encouraging generic substitution by health insurance programs, publicizing generic drugs policies, educating health providers about generics and guidelines regarding their use should be taken to promote generic substitution.

In this study, more than 90% of the respondents were aware of the definition of generic drugs. This was higher than some published studies, in other countries, like Poland, Pakistan, and Malaysia (63%).<sup>[20-22]</sup> In our study, few respondents (9.8%) identified the correct criteria for bioequivalence, this lack of knowledge on the regulatory requirements may lead to less confidence in the quality of generic drugs. In a study set in Palestine, 302 community pharmacists were asked to identify the correct Food and Drug Administration (FDA) acceptance criteria for bioequivalence; a similar percentage of community pharmacists (12.6%) provided the correct answer.<sup>[23]</sup> Nearly 30% of respondents had a neutral attitude towards efficacy (29.9%), safety (28.7%) of generic drugs, and interchangeability with brand-name equivalents (34.2%). The reason may be that the quality of generic drugs may not be clearly evident in pharmacists' clinical practice sites since generic substitution had only been implemented for one year. 71.4% of Chinese pharmacists surveyed supported the national policy of generic substitution. These results were similar to various studies conducted in Iran (71.6%), Poland (67.1%), Saudi Arabia (68.5%), Lebanon (64%).<sup>[20, 24-26]</sup> It was interesting to find a significant positive correlation between total knowledge score regarding generics and total perception score, indicating that pharmacists who are more knowledgeable in generic drugs may hold a more supportive attitude towards generic substitution. This may suggest the importance of mass educational effort among pharmacists. More information on the issues of generic drugs make pharmacists confident in using and dispensing those products. Besides, significant differences were observed by location in both knowledge and perception, which could lead to locational differences in the implementation of the generic substitution policy.

In more recent years, China has made a significant effort to promote generic substitution. The NMPA requires that generic drugs approved before 2007 must be proved bioequivalent with brand innovators by the end of 2021. Drug products that have not passed the consistency evaluation will no longer be selected for the national centralized drug procurement if more than three other generic drug manufacturers have passed. On average drug prices dramatically decreased by 52% of the selected drugs because of price negotiations and volume-based national centralized drug procurement.<sup>[27]</sup> In 2017, NMPA published Approved Drug Lists in China, similar to the U.S.'s Orange Book, this list includes 17 varieties of approved generic drugs passed the consistency evaluation. Pharmaceutically equivalent products and therapeutically equivalent products are clearly coded in this list. However, further steps need to be taken to educate pharmacists.

To correct misconceptions on generic drugs, the NMPA should ensure that generic drugs meet quality standards by using the Good Manufacturing Practices. The generic drug approval process should be rigorous and transparent to the public. Negative perceptions and skepticisms can be

1  
2  
3 reduced through education that will create more awareness about generic drugs and the importance  
4 of generic substitution among healthcare providers and patients. As some studies have demonstrated,  
5 information with regard to generic substitution should be taught in college curricula to better prepare  
6 healthcare providers for future work.<sup>[28-30]</sup> One proposed measure that could be implemented to  
7 promote rational use of generic drugs is the establishment of standard operating procedures for  
8 generic substitution and formulary of the medical institutions.<sup>[31]</sup> Currently, generic drug use has  
9 been greatly encouraged in public hospitals in the 11 pilot locations. Although this national  
10 centralized procurement brought tremendous use of generic drugs, physicians tend to veer towards  
11 using brand-name drugs with the same pharmacological action. A small number of our survey  
12 respondents agreed that in order to promote generic substitution medical institutions should restrict  
13 the use of brand-name drugs 513 (22.4%) and 271 (11.8%) responded that hospitals should only  
14 retain the corresponding generic drugs or drugs in the same pharmacologic drug class.

15  
16 In this survey, only a few pharmacists reported other factors influencing patients' acceptance  
17 of generic substitution, such as patients' financial burden (12.9%), out-of-pockets cost of drugs  
18 (10.7%) and physicians' suggestions (9.1%). Currently, generic substitution has been supported by  
19 several Chinese health insurers, providing greater reimbursement for generic drugs (versus brand-  
20 name drugs). Because the survey respondents were from well-developed cities in China, the  
21 difference in drug cost may not have been a barrier for these patients. However, cost-saving factor  
22 may be pivotal for patients in lower-income areas; therefore, cost may not be the only incentive that  
23 should be offered to encourage generic substitution. Many of the respondents proposed that supply  
24 issues for generic drugs resulted in frequent medication changes and poor medication adherence.  
25 Therefore, supply guarantee of selected drugs and sustainability of formulary in the national  
26 procurement should be strengthened. The government should formulate regulations or acts for  
27 consistency evaluation of generic drugs and rigid quality supervision.

28  
29 Pharmacists play a key role in managing rational use of medications, balancing between  
30 efficacy, safety and economic use of drugs. Pharmacotherapy monitoring and adverse drug reaction  
31 reporting should be emphasized to identify safety concerns regarding generic drugs. It is important  
32 for pharmacists to provide proper education to prevent patient confusion related to generic  
33 substitution and thus improve patient adherence. Pharmacists should also provide education and  
34 guidance to physicians and consumers on proper use of generic drugs. Therefore, attitudes of  
35 pharmacists may be a crucial factor affecting the acceptance of generics by both physicians and  
36 patients. In some states in the U.S., pharmacists must substitute a generically equivalent drug if  
37 available. Other states allow the pharmacists to decide to provide substitution – if not otherwise  
38 indicated by the physician. And still other states impose an additional restriction that require  
39 pharmacists to obtain patients' consent before substituting with a generic product.<sup>[32]</sup> Several studies  
40 from Lebanon, Palestine and Qatar concluded pharmacists should have authority to perform generic  
41 substitution without consulting the prescribing physician.<sup>[23,26,33]</sup> However, pharmacists do not have  
42 authority to modify medication orders to allow for substitution in China, thus further progress needs  
43 to be made to improve this situation. We believe pharmacists may be authorized in implementing  
44 generic substitution for any medication in future.

45  
46 There are some limitations for this research. This study was performed in 11 locations in China,  
47 and most respondents were from large public hospitals; therefore, findings cannot be generalized to  
48 pharmacists practicing in other cities in China. The survey had a limited access to pharmacists in  
49 community settings or rural areas. This also limits generalizability of the findings. The data were  
50  
51  
52  
53  
54  
55  
56  
57  
58  
59  
60



not collected from a random sample, which may weaken the representativeness and reduce the accuracy. Moreover, because of the web-based sample survey tool, we cannot compute a response rate to the questionnaire and adjust for possible non-response bias. In addition, due to the self-administered format of questionnaires, we cannot rule out the possibility of social desirability bias because the content of questionnaires about generic substitution correlates to the national policies and politics as well as the knowledge scores represent the respondents' perception.

Future research is needed to explore physicians' and patients' perceptions and practices regarding implementation of the national centralized procurement and generic substitution program in China. Generic drugs on the market are required to be bioequivalent to the reference product; however, their therapeutic equivalence may not necessarily be identical, especially for narrow therapeutic index drugs. Therefore, evidence of the efficacy and safety of generic drugs should be obtained from real-world studies to prove therapeutic equivalence.

### **Conclusion**

In conclusion, Chinese pharmacists have a fairly good knowledge of generic drugs used in the national centralized procurement program and generally have positive attitudes towards generic substitution. The main obstacle for further utilization of generic drugs is lack of trust in efficacy and safety. Education and awareness of generic substitution should be promoted and clear standard guidelines need to be created.

### **Acknowledgments**

The authors would like to thank all the pharmacists who participated in the study. The authors would also like to express their gratitude to all the experts and researchers for providing feedback on this questionnaire.

### **Funding**

This study was partially funded by Peking Pharmacological Society. The funders had no role in study design, data collection and analysis, decision to publish or preparation of the manuscript.

### **Author contributions**

J.Q. led the overall study design, conducted the statistical analyses, interpreted the data, and wrote the first draft of the manuscript. W.Z. and B.Z. made the study design, collected the data, contributed to interpretation of findings and edited the manuscript. S.W., L.D., X.L., Y.G., J.L., X.D., and D.M. were involved in the design of the questionnaire. H.P., L.D., X.D., and D.M. participated in distributing the questionnaire. R.L.T., K.W.S., and S.L. contributed to editing the manuscript and interpretation of findings. All the authors read, made comments on manuscripts, approved the final manuscript and agreed on its submission.

### **Conflicts of Interest**

The authors declare that they have no competing interest.

### **Ethical approval**

The study was approved by the Institutional Review Board (IRB) of Peking Union Medical College Hospital in China (IRB#: S-K1136) and St. Louis College of Pharmacy in the USA (IRB#: 2020-18). Anonymity was ensured by gathering and analyzing data in aggregate and only allowing members of the research team access to the password-protected data.

### **Data availability statement**

Data are available on reasonable request. The data generated and/or analyzed during the present study are not publicly available, but they are available from the corresponding author on reasonable request.



## Supplementary file

Table S1. Pharmacists' knowledge about generic drugs. Table S2. Association between pharmacists' perception and demographic characteristics. Table S3. Crosstabs between support for generic substitution and locations.

## References

1. Squires D, Anderson C. U.S. health care from a global perspective: spending, use of services, prices, and health in 13 countries. *Issue Brief (Commonw Fund)*. 2015;15:1-15.
2. Hassali MA, Alrasheedy AA, McLachlan A, et al. The experiences of implementing generic medicine policy in eight countries: A review and recommendations for a successful promotion of generic medicine use. *Saudi Pharm J*. 2014;22(6):491-503.
3. Wouters OJ, Kanavos PG, McKEE M. Comparing Generic Drug Markets in Europe and the United States: Prices, Volumes, and Spending. *Milbank Q*. 2017;95(3):554-601.
4. Wouters OJ, Kanavos PG. A comparison of generic drug prices in seven European countries: a methodological analysis. *BMC Health Serv Res*. 2017;17(1):242. Published 2017 Mar 31. doi:10.1186/s12913-017-2184-5.
5. Vogler S, Paris V, Ferrario A, et al. How Can Pricing and Reimbursement Policies Improve Affordable Access to Medicines? Lessons Learned from European Countries. *Appl Health Econ Health Policy*. 2017;15(3):307-321.
6. World Health Organization. Multisource (Generic) Pharmaceutical Products: Guidelines on Registration Requirements to Establish Interchangeability. Available online: 2005[http://www.who.int/medicines/services/expertcommittees/pharmprep/QAS04\\_093Rev4\\_final.pdf](http://www.who.int/medicines/services/expertcommittees/pharmprep/QAS04_093Rev4_final.pdf), (accessed on 9th April 2020).
7. Posner J, Griffin JP. Generic substitution. *British Journal of Clinical Pharmacology*, 2011;72(5):731-2.
8. National Health Commission. Chinese Health Statistics Yearbook 2019. National Bureau of Statistics: Beijing, China, 2020.
9. Yip W, Fu H, Chen A T, et al. 10 years of health-care reform in China: progress and gaps in Universal Health Coverage. *The Lancet*, 2019, 394(10204):1192-1204.
10. Manning N. The Reform of Health Policy in China – Left Behind in the Race to Industrialize?. *Social Policy & Administration*, 2011, 45(6):649-661.
11. Cameron A, Mantel-Teeuwisse AK, Leufkens HG, et al. Switching from originator brand medicines to generic equivalents in selected developing countries: how much could be saved?. *Value Health*. 2012;15(5):664-673.
12. Hu L, Yu Z, Yuan Q, Hu Y, Ung COL. Opportunities and Challenges of Multinational Pharmaceutical Enterprises in Transforming Pharmaceutical Market in China. *Ther Innov Regul Sci*. 2019;53(2):207-214.
13. Huang B, Barber SL, Xu M, Cheng S. Make up a missed lesson-New policy to ensure the interchangeability of generic drugs in China. *Pharmacol Res Perspect*. 2017;5(3):e00318.
14. Lulin Z, Antwi HA, Wang W, et al. The effect of herd formation among healthcare investors on health sector growth in China. *Int J Equity Health*. 2016;15:113.
15. Zuo J, Gao Y, Bou-Chacra N, et al. Challenges and Opportunities to Use Biowaivers to Compare Generics in China. *AAPS PharmSciTech*, 2014, 15(5):1070-1075.
16. China Food and Drug Administration. Evaluation scheme of generic quality consistency. China Food and Drug Administration.2013. Available online: <http://www.nmpa.gov.cn/WS04/CL2196/323980.html>. (accessed on 31st May 2020).
17. State Council of the People's Republic of China. Notification on the carrying out consistency evaluation of the quality and efficacy of generic drugs. Available online: [http://www.gov.cn/zhengce/content/2016-03/05/content\\_5049364.htm](http://www.gov.cn/zhengce/content/2016-03/05/content_5049364.htm). (accessed on 31st May 2020).
18. National Medical Products Administration. Guidelines on statistical analysis in bioequivalence studies and technology in bioequivalence studies of high-variation drugs. Available online: <http://www.nmpa.gov.cn/WS04/CL2138/331454.html>. (accessed on 31st May 2020).
19. State Council Information Office. Regular meeting on the State Council policy on 27th, November,2019. Available online: <http://www.nhc.gov.cn/xcs/s7847/201911/dad7e0b2a26a4>

- f56bd68836d33ab2fe2.shtml. (accessed on 8th August 2020).
20. Drozdowska A, Hermanowski T. Exploring factors underlying the attitude of community pharmacists to generic substitution: a nationwide study from Poland. *International Journal of Clinical Pharmacy*, 2016, 38(1):162-170.
  21. Jamshed S, Hassali M, Ibrahim M, et al. Knowledge, perception and attitude of community pharmacists towards generic medicines in Karachi, Pakistan: a qualitative insight. *Trop J Pharm Res*. 2010;9(4).
  22. Chua GN, Hassali MA, Shafie AA, et al. A survey exploring knowledge and perceptions of general practitioners towards the use of generic medicines in the northern state of Malaysia. *Health policy*.2010;95(2–3):229–35.
  23. Shraim NY, Al Taha TA, Qawasmeh RF, et al. Knowledge, attitudes and practices of community pharmacists on generic medicines in Palestine: a cross-sectional study. *BMC Health Serv Res*. 2017;17(1):847.
  24. Nazila Y, Gholamhossein M, Farzad P, et al. Generic substitution policy implementation: A pharmacists' perspective survey. *Journal of generic medicines*, 2015.
  25. Alkhuzae FS, Almalki HM, Attar AY, et al. Evaluating community pharmacists' perspectives and practices concerning generic medicines substitution in Saudi Arabia: A cross-sectional study. *Health Policy*. 2016;120(12):1412-1419.
  26. El-Jardali F, Fadlallah R, Morsi RZ, et al. Pharmacists' views and reported practices in relation to a new generic drug substitution policy in Lebanon: a mixed methods study. *Implement Sci*. 2017;12(1):23.
  27. China Daily. China to further pilot medicine procurement program. Available online: <https://www.chinadaily.com.cn/a/201904/04/WS5ca5fe88a3104842260b4844.html>. (accessed on 8th August 2020).
  28. Shrank WH, Liberman JN, Fischer MA, et al. Physician perceptions about generic drugs. *Ann Pharmacother* 2011;45:31-8.
  29. Al-Tamimi SK, et al. The need to incorporate generic medicines topic in the curriculum of Yemeni pharmacy colleges. *Int J Pharm Pract*. 2016;24(1):72-3.
  30. Alrasheedy AA, Hassali MA, Aljadhey H, Al-Tamimi SK. The need to cover generic medications and generic substitution practice in the curricula of pharmacy colleges in Saudi Arabia. *Am J Pharm Educ*. 2014;78(5):108.
  31. Chuaa GN, Hassali MA, Shafie AA, et al. A survey exploring knowledge and perceptions of general practitioners towards the use of generic medicines in the northern state of Malaysia. *Health Policy*,2010; 95:229-35.
  32. Assistant Secretary for Planning and Evaluation (ASPE) U.S. Department of Health and Human Services. Expanding the use of generic drugs. Available online: <https://aspe.hhs.gov/basic-report/expanding-use-generic-drugs#Legislative>. (accessed on 21st June 2020).
  33. Awaisu A, Kheir N, Ibrahim MI, et al. Knowledge, attitudes, and practices of community pharmacists on generic medicines in Qatar. *Int J Clin Pharm*, 2014;36(2):394–404.

**Table S1. Pharmacists' knowledge about generic drugs.**

| Statement                                                                                                                                                                                                                                                                                                            | Yes or Correct response N (%) | No or Incorrect response N (%) | Unsure N (%) | Age (P-value) <sup>a</sup> | Terminal Degree (P-value) <sup>a</sup> | Years in practice (P-value) <sup>a</sup> | Professional title (P-value) <sup>a</sup> | Gender (P-value)* | Location (P-value)* | Medical Institution (P-value)* |
|----------------------------------------------------------------------------------------------------------------------------------------------------------------------------------------------------------------------------------------------------------------------------------------------------------------------|-------------------------------|--------------------------------|--------------|----------------------------|----------------------------------------|------------------------------------------|-------------------------------------------|-------------------|---------------------|--------------------------------|
| Were you aware that China carries out the program of quality and efficacy consistency evaluation of generic drugs?                                                                                                                                                                                                   | 2118 (92.4)                   | 74 (3.2)                       | 99 (4.3)     | 0.142                      | <b>0.000</b>                           | 0.447                                    | <b>0.000</b>                              | 0.155             | <b>0.026</b>        | 0.794                          |
| Were you aware of the logo "Have passed the Consistency Evaluation" on the generic products?                                                                                                                                                                                                                         | 1718 (75.0)                   | 320 (14.0)                     | 253 (11.0)   | <b>0.010</b>               | 0.129                                  | 0.070                                    | 0.068                                     | <b>0.020</b>      | <b>0.000</b>        | 0.450                          |
| True/False: In principle, the method of bioequivalence tests in vivo is used for Consistency Evaluation. The standard of bioequivalence is that the 90% confidence interval of the geometric mean experiment/ reference ratios for main pharmacokinetic parameters (Cmax and AUC) falls entirely within the range of | 225 (9.8)                     | 1666 (72.7)                    | 400 (17.5)   | 0.052                      | 0.164                                  | 0.734                                    | 0.096                                     | 0.251             | <b>0.000</b>        | 0.254                          |

90.00% ~ 120.00%.

Were you aware that all the generic drugs in national centralized procurement have passed the consistency evaluation of quality and efficacy?

|                |             |              |       |       |       |              |       |              |       |
|----------------|-------------|--------------|-------|-------|-------|--------------|-------|--------------|-------|
| 2067<br>(90.2) | 68<br>(3.0) | 156<br>(6.8) | 0.094 | 0.153 | 0.076 | <b>0.001</b> | 0.097 | <b>0.003</b> | 0.449 |
|----------------|-------------|--------------|-------|-------|-------|--------------|-------|--------------|-------|

True/False: The generic drugs in the national centralized procurement have the same active ingredients, dosage forms, routes of administration and therapeutic effects with the brand drugs.

|                |             |              |       |       |       |              |       |              |       |
|----------------|-------------|--------------|-------|-------|-------|--------------|-------|--------------|-------|
| 2078<br>(90.7) | 57<br>(2.5) | 156<br>(6.8) | 0.338 | 0.104 | 0.467 | <b>0.046</b> | 0.213 | <b>0.047</b> | 0.108 |
|----------------|-------------|--------------|-------|-------|-------|--------------|-------|--------------|-------|

Bold *P*-values represent statistical significance.

\**P*-value calculated using Chi-square.

<sup>a</sup> *P*-value calculated using Kruskal-Wallis test.

**Table S2. Association between pharmacists' perception and demographic characteristics.**

| Statement                                                                                                                | Strongly Agree<br>N (%) | Agree<br>N (%) | Neutral<br>N (%) | Disagree<br>N (%) | Strongly Disagree<br>N (%) | Age<br>(P-value)<br>* | Gender<br>(P-value)<br>a | Terminal Degree<br>(P-value)<br>* | Years in practice<br>(P-value)<br>* | Location<br>(P-value)<br>* | Professional title<br>(P-value)<br>* | Medical institution<br>(P-value)<br>* |
|--------------------------------------------------------------------------------------------------------------------------|-------------------------|----------------|------------------|-------------------|----------------------------|-----------------------|--------------------------|-----------------------------------|-------------------------------------|----------------------------|--------------------------------------|---------------------------------------|
| Generic drugs that have passed the consistency evaluation are as effective as brand-name equivalents.                    | 361<br>(15.8)           | 1179<br>(51.5) | 684<br>(29.9)    | 58<br>(2.5)       | 9<br>(0.4)                 | 0.752                 | <b>0.000</b>             | <b>0.000</b>                      | 0.400                               | <b>0.001</b>               | <b>0.004</b>                         | 0.582                                 |
| Generic drugs that have passed the consistency evaluation are as safe as brand-name equivalents.                         | 355<br>(15.5)           | 1226<br>(53.5) | 657<br>(28.7)    | 50<br>(2.2)       | 3<br>(0.1)                 | 0.572                 | <b>0.001</b>             | <b>0.000</b>                      | 0.441                               | 0.269                      | <b>0.016</b>                         | 0.554                                 |
| Generic drugs that have passed the consistency evaluation are less expensive than brand-name equivalents.                | 1076<br>(47.0)          | 987<br>(43.1)  | 218 (9.5)        | 10<br>(0.4)       | 0<br>(0.0)                 | 0.312                 | <b>0.030</b>             | <b>0.000</b>                      | 0.464                               | 0.108                      | 0.131                                | 0.099                                 |
| Generic drugs that have passed the consistency evaluation are interchangeable with brand-name drugs.                     | 314<br>(13.7)           | 1085<br>(47.4) | 784<br>(34.2)    | 96<br>(4.2)       | 12<br>(0.5)                | 0.074                 | <b>0.000</b>             | <b>0.000</b>                      | 0.050                               | <b>0.000</b>               | 0.188                                | 0.131                                 |
| Replacing brand-name drugs with generic drugs that passed the consistency evaluation may change the clinical outcomes of | 189 (8.2)               | 615<br>(26.8)  | 1047<br>(45.7)   | 387 (16.9)        | 53 (2.3)                   | <b>0.000</b>          | <b>0.002</b>             | 0.062                             | <b>0.001</b>                        | <b>0.004</b>               | <b>0.000</b>                         | 0.190                                 |

1  
2  
3  
4

---

5 medication treatment.\*

6

7 Application of generic drugs  
8 that passed the consistency  
9 evaluation could improve  
10 adherence to medication  
11 treatment of patients.

|    |        |        |        |            |       |       |              |              |              |              |              |              |
|----|--------|--------|--------|------------|-------|-------|--------------|--------------|--------------|--------------|--------------|--------------|
| 12 | 228    | 873    | 1005   | 169 (7.4)  | 16    | 0.029 | <b>0.022</b> | <b>0.002</b> | <b>0.037</b> | <b>0.042</b> | <b>0.003</b> | 0.204        |
| 13 | (10.0) | (38.1) | (43.9) |            | (0.7) |       |              |              |              |              |              |              |
| 14 | 640    | 1369   | 258    | 20         | 4     | 0.415 | <b>0.033</b> | <b>0.028</b> | 0.167        | 0.143        | 0.119        | 0.151        |
| 15 | (27.9) | (59.8) | (11.3) | (0.9)      | (0.2) |       |              |              |              |              |              |              |
| 16 | 191    | 510    | 759    | 673 (29.4) | 158   | 0.075 | <b>0.024</b> | <b>0.001</b> | 0.128        | <b>0.002</b> | 0.593        | <b>0.034</b> |
| 17 | (8.3)  | (22.3) | (33.1) |            | (6.9) |       |              |              |              |              |              |              |
| 18 | 661    | 1312   | 296    | 20         | 2     | 0.503 | 0.051        | <b>0.000</b> | 0.415        | <b>0.033</b> | <b>0.005</b> | 0.217        |
| 19 | (28.9) | (57.3) | (12.9) | (0.9)      | (0.1) |       |              |              |              |              |              |              |
| 20 | 409    | 1225   | 619    | 32         | 6     | 0.135 | <b>0.000</b> | 0.051        | 0.410        | <b>0.000</b> | 0.662        | <b>0.026</b> |
| 21 | (17.9) | (53.5) | (27.0) | (1.4)      | (0.3) |       |              |              |              |              |              |              |

22 Generic drugs can be  
23 exempted from clinical trials  
24 for approval if they passed  
25 bioequivalence trials in vivo.

26 Relevant organizations  
27 should formulate and issue  
28 standard guidelines for  
29 generic substitution.

30  
31 support the current policy  
32 of substituting brand-name  
33 drugs with generic drugs  
34 that have passed the  
35 consistency evaluation.

36

---

37 **Bold P-values represent statistical significance.**

38 **\*P-value calculated using Kruskal-Wallis test.**

39  
40  
41  
42  
43  
44  
45  
46

1  
2  
3  
4  
5  
6  
7  
8  
9  
10  
11  
12  
13  
14  
15  
16  
17  
18  
19  
20  
21  
22  
23  
24  
25  
26  
27  
28  
29  
30  
31  
32  
33  
34  
35  
36  
37  
38  
39  
40  
41  
42  
43  
44  
45  
46

<sup>a</sup> P-value calculated using Mann-Whitney U test.

For peer review only

**Table S3. Crosstabs between support for generic substitution and locations.**

| <b>N (%)</b>     | <b>Beijing</b>  | <b>Tianjin</b>  | <b>Shanghai</b> | <b>Chongqing</b> | <b>Shenyang</b> | <b>Dalian</b>   | <b>Xiamen</b>  | <b>Guangzhou</b> | <b>Shenzhen</b> | <b>Chengdu</b> | <b>Xi-an</b>    | <b>Total</b>     |
|------------------|-----------------|-----------------|-----------------|------------------|-----------------|-----------------|----------------|------------------|-----------------|----------------|-----------------|------------------|
| <b>Agreed</b>    | 423<br>(76.8%)  | 147<br>(77.4%)  | 95<br>(53.3%)   | 66<br>(64.7%)    | 127<br>(67.9%)  | 189<br>(72.4%)  | 71<br>(78.9%)  | 104<br>(65.4%)   | 191<br>(72.9%)  | 71<br>(71.7%)  | 150<br>(70.7%)  | 1634<br>(71.3%)  |
| <b>Neutral</b>   | 118<br>(21.4%)  | 43<br>(22.6%)   | 76<br>(42.7%)   | 34<br>(33.3%)    | 55<br>(29.4%)   | 70<br>(26.8%)   | 18<br>(20.0%)  | 52<br>(32.7%)    | 66<br>(25.2%)   | 26<br>(26.3%)  | 61<br>(28.8%)   | 619<br>(27.0%)   |
| <b>Disagreed</b> | 10<br>(1.8%)    | 0<br>(0.0%)     | 7<br>(4.0%)     | 2<br>(2.0%)      | 5<br>(2.7%)     | 2<br>(0.8%)     | 1<br>(1.1%)    | 3<br>(1.9%)      | 5<br>(1.9%)     | 2<br>(2.0%)    | 1<br>(0.5%)     | 38<br>(1.7%)     |
| <b>Total</b>     | 551<br>(100.0%) | 190<br>(100.0%) | 178<br>(100.0%) | 102<br>(100.0%)  | 187<br>(100.0%) | 261<br>(100.0%) | 90<br>(100.0%) | 159<br>(100.0%)  | 262<br>(100.0%) | 99<br>(100.0%) | 212<br>(100.0%) | 2291<br>(100.0%) |



# BMJ Open

## Knowledge, perceptions, and practices of pharmacists regarding generic substitution in China: A cross-sectional study

|                               |                                                                                                                                                                                                                                                                                                                                                                                                                                                                                                                                                                                                                                                                                                                                                                                                                                                                                                                                                                                                                                                                                                                                                                                                                                                                                                                                                                                                                                                                                                                                                                                                                                                                                                                                                                                                                                                                                                                                                                                                                                                                                                                                                                                                                  |
|-------------------------------|------------------------------------------------------------------------------------------------------------------------------------------------------------------------------------------------------------------------------------------------------------------------------------------------------------------------------------------------------------------------------------------------------------------------------------------------------------------------------------------------------------------------------------------------------------------------------------------------------------------------------------------------------------------------------------------------------------------------------------------------------------------------------------------------------------------------------------------------------------------------------------------------------------------------------------------------------------------------------------------------------------------------------------------------------------------------------------------------------------------------------------------------------------------------------------------------------------------------------------------------------------------------------------------------------------------------------------------------------------------------------------------------------------------------------------------------------------------------------------------------------------------------------------------------------------------------------------------------------------------------------------------------------------------------------------------------------------------------------------------------------------------------------------------------------------------------------------------------------------------------------------------------------------------------------------------------------------------------------------------------------------------------------------------------------------------------------------------------------------------------------------------------------------------------------------------------------------------|
| Journal:                      | <i>BMJ Open</i>                                                                                                                                                                                                                                                                                                                                                                                                                                                                                                                                                                                                                                                                                                                                                                                                                                                                                                                                                                                                                                                                                                                                                                                                                                                                                                                                                                                                                                                                                                                                                                                                                                                                                                                                                                                                                                                                                                                                                                                                                                                                                                                                                                                                  |
| Manuscript ID                 | bmjopen-2021-051277.R1                                                                                                                                                                                                                                                                                                                                                                                                                                                                                                                                                                                                                                                                                                                                                                                                                                                                                                                                                                                                                                                                                                                                                                                                                                                                                                                                                                                                                                                                                                                                                                                                                                                                                                                                                                                                                                                                                                                                                                                                                                                                                                                                                                                           |
| Article Type:                 | Original research                                                                                                                                                                                                                                                                                                                                                                                                                                                                                                                                                                                                                                                                                                                                                                                                                                                                                                                                                                                                                                                                                                                                                                                                                                                                                                                                                                                                                                                                                                                                                                                                                                                                                                                                                                                                                                                                                                                                                                                                                                                                                                                                                                                                |
| Date Submitted by the Author: | 29-Aug-2021                                                                                                                                                                                                                                                                                                                                                                                                                                                                                                                                                                                                                                                                                                                                                                                                                                                                                                                                                                                                                                                                                                                                                                                                                                                                                                                                                                                                                                                                                                                                                                                                                                                                                                                                                                                                                                                                                                                                                                                                                                                                                                                                                                                                      |
| Complete List of Authors:     | <p>Qu, Jinghan; State Key Laboratory of Complex Severe and Rare Diseases, Peking Union Medical College Hospital, Chinese Academy of Medical Sciences and Peking Union Medical College Hospital, Department of Pharmacy</p> <p>Zuo, Wei; State Key Laboratory of Complex Severe and Rare Diseases, Peking Union Medical College Hospital, Chinese Academy of Medical Sciences and Peking Union Medical College Hospital, Department of Pharmacy</p> <p>Wang, Shaohong; State Key Laboratory of Complex Severe and Rare Diseases, Peking Union Medical College Hospital, Chinese Academy of Medical Sciences and Peking Union Medical College Hospital, Department of Pharmacy</p> <p>Du, Liping; State Key Laboratory of Complex Severe and Rare Diseases, Peking Union Medical College Hospital, Chinese Academy of Medical Sciences and Peking Union Medical College Hospital, Department of Pharmacy</p> <p>Liu, Xin; State Key Laboratory of Complex Severe and Rare Diseases, Peking Union Medical College Hospital, Chinese Academy of Medical Sciences and Peking Union Medical College Hospital, Department of Pharmacy</p> <p>Gao, Yang; State Key Laboratory of Complex Severe and Rare Diseases, Peking Union Medical College Hospital, Chinese Academy of Medical Sciences and Peking Union Medical College Hospital, Department of Pharmacy</p> <p>Li, Jiantao; State Key Laboratory of Complex Severe and Rare Diseases, Peking Union Medical College Hospital, Chinese Academy of Medical Sciences and Peking Union Medical College Hospital, Department of Pharmacy</p> <p>Pan, Hui; Peking Union Medical College Hospital, Department of Medical Administration</p> <p>Du, Xiaoli; State Key Laboratory of Complex Severe and Rare Diseases, Peking Union Medical College Hospital, Chinese Academy of Medical Sciences and Peking Union Medical College Hospital, Department of Pharmacy</p> <p>Mei, Dan; State Key Laboratory of Complex Severe and Rare Diseases, Peking Union Medical College Hospital, Chinese Academy of Medical Sciences and Peking Union Medical College Hospital, Department of Pharmacy</p> <p>Took, Roxane; St. Louis College of Pharmacy, Department of Pharmacy</p> |

|                                    |                                                                                                                                                                                                                                                                                                                                                             |
|------------------------------------|-------------------------------------------------------------------------------------------------------------------------------------------------------------------------------------------------------------------------------------------------------------------------------------------------------------------------------------------------------------|
|                                    | Practice<br>Schafermeyer, Kenneth; St. Louis College of Pharmacy, Department of<br>Pharmaceutical and Administrative Sciences<br>Lukas, Stephanie; St. Louis College of Pharmacy, Department of<br>Pharmaceutical and Administrative Sciences<br>Zhang, Bo; Chinese Academy of Medical Sciences and Peking Union<br>Medical College, Department of Pharmacy |
| <b>Primary Subject<br>Heading</b>: | Health policy                                                                                                                                                                                                                                                                                                                                               |
| Secondary Subject Heading:         | Health economics, Health services research, Medical education and<br>training, Pharmacology and therapeutics, Public health                                                                                                                                                                                                                                 |
| Keywords:                          | EDUCATION & TRAINING (see Medical Education & Training), Health<br>policy < HEALTH SERVICES ADMINISTRATION & MANAGEMENT, PUBLIC<br>HEALTH, Health economics < HEALTH SERVICES ADMINISTRATION &<br>MANAGEMENT, HEALTH SERVICES ADMINISTRATION & MANAGEMENT                                                                                                   |
|                                    |                                                                                                                                                                                                                                                                                                                                                             |

SCHOLARONE™  
Manuscripts



I, the Submitting Author has the right to grant and does grant on behalf of all authors of the Work (as defined in the below author licence), an exclusive licence and/or a non-exclusive licence for contributions from authors who are: i) UK Crown employees; ii) where BMJ has agreed a CC-BY licence shall apply, and/or iii) in accordance with the terms applicable for US Federal Government officers or employees acting as part of their official duties; on a worldwide, perpetual, irrevocable, royalty-free basis to BMJ Publishing Group Ltd ("BMJ") its licensees and where the relevant Journal is co-owned by BMJ to the co-owners of the Journal, to publish the Work in this journal and any other BMJ products and to exploit all rights, as set out in our [licence](#).

The Submitting Author accepts and understands that any supply made under these terms is made by BMJ to the Submitting Author unless you are acting as an employee on behalf of your employer or a postgraduate student of an affiliated institution which is paying any applicable article publishing charge ("APC") for Open Access articles. Where the Submitting Author wishes to make the Work available on an Open Access basis (and intends to pay the relevant APC), the terms of reuse of such Open Access shall be governed by a Creative Commons licence – details of these licences and which [Creative Commons](#) licence will apply to this Work are set out in our licence referred to above.

Other than as permitted in any relevant BMJ Author's Self Archiving Policies, I confirm this Work has not been accepted for publication elsewhere, is not being considered for publication elsewhere and does not duplicate material already published. I confirm all authors consent to publication of this Work and authorise the granting of this licence.

**Title Page****Title**

Knowledge, perceptions, and practices of pharmacists regarding generic substitution in China: A cross-sectional study

**Author**

Jinghan Qu<sup>1</sup>, Wei Zuo<sup>1</sup>, Shaohong Wang<sup>1</sup>, Liping Du<sup>1</sup>, Xin Liu<sup>1</sup>, Yang Gao<sup>1</sup>, Jiantao Li<sup>1</sup>, Hui Pan<sup>2</sup>, Xiaoli Du<sup>1</sup>, Dan Mei<sup>1</sup>, Roxane L. Took<sup>3</sup>, Kenneth W. Schafermeyer<sup>4</sup>, Stephanie Lukas<sup>4</sup>, Bo Zhang<sup>1</sup>

These authors contributed equally to this work.

**Author Affiliations**

1 Department of Pharmacy, State Key Laboratory of Complex Severe and Rare Diseases, Peking Union Medical College Hospital, Chinese Academy of Medical Sciences and Peking Union Medical College Hospital, Beijing, China

2 Department of Medical Administration, State Key Laboratory of Complex Severe and Rare Diseases, Peking Union Medical College Hospital, Chinese Academy of Medical Sciences and Peking Union Medical College Hospital, Beijing, China

3 Department of Pharmacy Practice, St. Louis College of Pharmacy, St. Louis, USA

4 Department of Pharmaceutical and Administrative Sciences, St. Louis College of Pharmacy, St. Louis, USA

**Corresponding author**

Bo Zhang. Email: zhangbopumch@163.com. Address: No.1 Shuaifuyuan Street, Dongcheng District, Beijing, China. Telephone numbers: 86-010-6527.

**Word count**

4293 words totally.

**Keywords**

Generic Substitution; Knowledge; Perceptions; Practices; Pharmacists

## Abstract

**Objective:** To evaluate pharmacists' knowledge, perceptions and practices towards generic substitution in the 11 pilot locations in China.

**Design:** An online cross-sectional survey using questionnaires was conducted. A convenience sampling technique was implemented to recruit pharmacists.

**Setting and participants:** The study took place in medical institutions of 11 pilot locations that participated in the pilot national centralized procurement program in 2019. Two thousand, two hundred and ninety-one (2291) pharmacists including hospital pharmacists or community pharmacists based on health-systems or clinics participated in the study.

**Results:** Most of the participants had the good knowledge of requirements for evaluating the quality and efficacy of generic drugs (n=2118; 92.4%), and the definition of generic drugs (n=2078; 90.7%). In terms of perceptions, 67.3% of respondents were of the opinion that generic drugs are equally as effective as the brand-name drugs, and 69.0% of respondents were of the opinion that generic drugs are as safe as brand equivalents. A high percentage of participants supported the policy of generic substitution (n=1634; 71.4%). A significant positive correlation was demonstrated between total knowledge score and total perception score ( $\rho=0.267$ ;  $P<0.001$ ). Efficacy, safety, and the direction of national policies and hospital regulations were the main factors affecting pharmacists' willingness to dispense generic drugs.

**Conclusions:** The study identified gaps in respondents' knowledge and perceptions of generic substitution. Pharmacists who are more knowledgeable in generic drugs tend to hold a more supportive attitude towards generic substitution. Although it appeared that pharmacists in China have largely accepted generic substitution, they still have concerns regarding the reliability and quality of generic drugs. The current issues need to be addressed for the realization of the true value of generic drugs as part of the country's healthcare cost-containment strategy as well as the implementation of generic substitution policy in China.

### Strengths and limitations of this study

- This cross-sectional study is one of the few surveys evaluating the knowledge, perceptions, and practices of pharmacists regarding generic drugs after implementing the national centralized procurement in China.
- The current findings have important implications in improvement of generic drugs policy and its implementation.
- This survey recruited a large number of respondents (n=2291). The Cronbach's alpha value for perceptions is equal to 0.833, indicating a good level of reliability.
- The web-based sample survey tool could be a limitation because of non-randomized sampling.
- This study was performed in only 11 locations in China, which could limit generalizability of the findings.

## 1 Introduction

Healthcare expenditures have been constantly increasing worldwide,<sup>[1, 2]</sup> and expenditure on drugs is one of the fastest growing components of healthcare spending.<sup>[3-5]</sup> Generic drugs offer an opportunity for substantial savings to healthcare systems. Currently, generic drug prescribing has become a major cost-minimizing strategy to reduce the fiscal expenditures and financial burden to patients, and to increase accessibility to essential drugs globally. The World Health Organization defined a generic drug as “a pharmaceutical product, usually intended to be interchangeable with an innovator product that is manufactured without a license from the innovator company and marketed after the expiry date of the patent or other exclusive rights”.<sup>[6]</sup> Generic substitution is defined as the act of substituting a brand-name drug with an equivalent generic drug.<sup>[7]</sup>

In China, overall medical expenditures accounted for 6.57% of the gross domestic product (GDP) in 2018.<sup>[8]</sup> Approximately 28% of medical expenditures came from the government<sup>[8]</sup>. Overall medical expenditures in China steadily increased between 2008 and 2017, at an average annual rate of 12.2%, outpacing the real GDP growth of 8.1%.<sup>[9]</sup> The per-capita drug consumption in China has risen to the highest in the world.<sup>[10]</sup>

Controlling drug expenses in public hospitals is vital in controlling overall medical expenditures. According to Alexandra’s statistics,<sup>[11]</sup> due to the large volumes of medications consumed in public hospitals and a substantial price differential between the originator brand and lowest-priced generic products, 370 million U.S. dollars could be saved by switching only four drugs, saving patients an average of 65%. With the March 2019 implementation of the national centralized procurement program, generic substitution in China has become an irresistible trend.<sup>[12, 13]</sup> This program directed by the authorities was a new procurement model for drugs based on volume and bidding, with public institutions forming a procurement alliance.

China has become the second largest producer of pharmaceuticals in the world and is still growing rapidly.<sup>[14, 15]</sup> There are more than 8,135 pharmaceutical companies in China, most of which produce generic drugs. Ensuring that the large amounts of pharmaceutical products in the market are therapeutically equivalent has been challenging for Chinese authorities. Thus in 2013, the National Medical Products Administration (NMPA), formally known as the China Food and Drug Administration (CFDA), established a system to evaluate generic quality.<sup>[16]</sup> According to the regulations issued by the government in March 2016,<sup>[17]</sup> assessment of quality and efficacy via “consistency evaluation” is mandatory for generic drugs approved prior to 2007 in the National Essential Medicine List (2012). The NMPA requires that the 90% confidence interval of the geometric mean ratio for main pharmacokinetic parameters, the peak concentration (C<sub>max</sub>) and the area under concentration-time curve (AUC), of the product fall entirely within the range of 80.00%-125.00% in order to be bioequivalent.<sup>[18]</sup> By November 27, 2019, 323 drug products passed the consistency evaluation for quality and efficacy.<sup>[19]</sup> In the released NMPA standard reference product list, referenced products were selected from the brand equivalent or the same species acknowledged worldwide if the brand equivalent was not available.

The national centralized procurement program was approved by the State Council in January 2019 to significantly lower drug prices and to improve accessibility of drugs. Four municipalities and seven local cities were selected as the pilot cities, including Beijing, Tianjin, Shanghai, Chongqing, Shenyang, Dalian, Xiamen, Guangzhou, Shenzhen, Chengdu, Xi-an. Twenty-five drug products were selected in the pilot program, of which 22 were generic drugs that had previously passed the consistency evaluation and 3 were brand-name drugs. Drug manufacturers bid to be

1  
2  
3 1 contracted in this pilot program, and the successful manufacturers established a contract with an  
4 2 agreed upon purchase amount. By setting up this contract, the drug purchase price dropped  
5 3 dramatically. Generic drugs accounted for 63% in the Chinese market in 2018.<sup>[20]</sup> Due to the drug  
6 4 price gap between brand drugs and generic drugs, the brand drugs are highly accessible in large  
7 5 cities, while generic drugs are more accessible in small cities or rural areas. After the  
8 6 implementation of the national centralized procurement policy, the price of selected generic  
9 7 varieties decreased, subsequently the brand drugs price significantly declined, which promote the  
10 8 access to the brand and generic drugs. The selected generic varieties almost accounted for all market  
11 9 shares among non-brand drugs in the pilot locations.<sup>[21]</sup> By the end of 2019, the pilot program was  
12 10 extended to more cities and provinces forming a procurement alliance, which covered nearly all the  
13 11 Chinese mainland. The generic substitution policy evolved from this pilot; because more generic  
14 12 drugs cheaper than the originator brand went into the procurement program under the bidding  
15 13 mechanism and made up a large market share.

16 14 As essential members of health care system, pharmacists play an important role in spreading  
17 15 awareness about the generic substitution policy. Pharmacists advise physicians on the selection,  
18 16 dosages, interactions, and side effects of generic drugs in collaboration practice, and provide  
19 17 education and counseling about generic drugs for patients when dispensing drugs according to  
20 18 medical prescription. The primary objective of this study was to investigate the knowledge,  
21 19 perceptions, and practices of Chinese pharmacists regarding generic substitution after completion  
22 20 of the pilot year.

## 23 21 **Methods**

### 24 22 **Study design**

25 23 A self-administered, anonymous, online cross-sectional survey was conducted among hospital  
26 24 pharmacists or community pharmacists based on health-systems or clinics in the 11 pilot locations  
27 25 in China between April and May 2020. The 11 pilot locations were those participated in the national  
28 26 centralized procurement program in 2019.

### 29 27 **Questionnaire design**

30 28 The questionnaire was developed in the Chinese language after extensive literature search and  
31 29 review.<sup>[22-28]</sup> The first draft of the questionnaire consisted of 32 items. The preliminary version of  
32 30 the questionnaire was peer-reviewed by 7 researchers, and assessed by 10 experts for  
33 31 appropriateness of clinical terminology, completeness, accuracy and logical sequence of the  
34 32 statements. Based on the suggestions, we refined it and deleted four items--the type of medical  
35 33 institutions, the familiarity with generic drugs, the knowledge of policy on generic drugs, and  
36 34 perceptions on access to generic drugs. Then the questionnaire was piloted among a sample of 20  
37 35 hospital pharmacists in Beijing to test the reliability and validity of the questionnaire. The data of  
38 36 the pilot study (Supplemental file 1 Table S1 and Table S2) were not included in the final study's  
39 37 statistical analysis. Minor changes were made according to feedbacks on ambiguities. The final  
40 38 questionnaire consisted of 29 items (Supplemental file 2). Survey questions were created in the  
41 39 Wenjuanxing website and was divided into four sections (demographic information, knowledge  
42 40 about generic drugs, perceptions towards generic substitution and practices on generic substitution).

#### 43 41 **Section I. Demographic information**



1  
2  
3  
4  
5  
6  
7  
8  
9  
10  
11  
12  
13  
14  
15  
16  
17  
18  
19  
20  
21  
22  
23  
24  
25  
26  
27  
28  
29  
30  
31  
32  
33  
34  
35  
36  
37  
38  
39  
40  
41  
42  
43  
44  
45  
46  
47  
48  
49  
50  
51  
52  
53  
54  
55  
56  
57  
58  
59  
60

1 The first section assessed pharmacists' demographic data including respondents' age, gender,  
2 terminal degree, professional title, years in practice, secondary department (e.g., outpatient,  
3 inpatient, clinical, laboratory, etc.), and geographical location.

#### 4 Section II. Knowledge about generic drugs

5 The second section contained five questions evaluating pharmacists' knowledge of the  
6 consistency evaluation for generic drugs and national policies related to the national centralized  
7 procurement program. For knowledge-based questions, respondents self-assessed their level of  
8 knowledge on these 3 questions by indicating either "yes", "no" or "unsure". Response of "yes"  
9 were given 1 point, and responses of "no" or "unsure" were scored zero. For true or false questions,  
10 correct responses were given 1 point, and a wrong or unsure response was scored zero. The  
11 maximum score on this knowledge section was 5 points.

#### 12 Section III. Perceptions towards generic substitution

13 The third section explored pharmacists' perception of generic substitution with 10 items; a  
14 five-point Likert scale was used to measure the level of respondents' agreement with offered  
15 statements. Response of strong disagreement was given 1 point and strong agreement was given 5  
16 point. For statistical reasons, the fifth question was reverse scored from 1(strong agreement) to 5  
17 point (strong disagreement). The maximum score on this perception section was 50 points.

#### 18 Section IV. Practices on generic substitution

19 In the fourth section, the practices, influencing factors, and difficulties related to generic  
20 substitution were examined. This section contained 5 multiple choice questions. For the last four  
21 questions, respondents were asked to select the top 3 important items.

#### 22 Data collection

23 On April 14th, 2020, the Wenjuanxing hyperlink for this survey was shared with pharmacist  
24 groups in the 11 pilot locations in China using WeChat, a multipurpose messaging app. Informed  
25 consent from all respondents was gained prior to the commencement of the questionnaire. In order  
26 to submit the questionnaire, Respondents had to complete all fields. Respondents were given  
27 approximately three weeks to complete the survey. The online survey was closed on May 6, 2020.  
28 Data from the survey were synchronously collected using Wenjuanxing website as soon as each  
29 respondent had finished the questionnaire.

#### 30 Inclusion and exclusion criteria

31 Pharmacists including hospital pharmacists or community pharmacists based on health-  
32 systems or clinics in the 11 locations were included in the survey. Data from other professionals in  
33 the medical institutions were excluded. Participation was voluntary; no incentive was provided for  
34 enrollment of participants.

#### 35 Patient and public involvement

36 Patients and/or public were not involved in this research.

#### 37 Statistical analysis

38 Data were analyzed with SPSS version 24. Reliability analysis (Cronbach alpha coefficient) of  
39 items focused on the perceptions towards generic substitution was applied. Normality of the data  
40 was tested using Kolmogorov-Smirnov test. If the data did not comply with the normal distribution,  
41 Mann-Whitney-U or Kruskal-Wallis tests were used to compare differences and Spearman's rank  
42 correlation was applied to determine associations among variables. *P*-values < 0.05 were considered  
43 significant.



## 1 Results

### 2 Demographics of respondents

3 A total of 2,291 pharmacists participated in the study. Nearly half of respondents (1,130; 49.3%)  
4 were in the age group of 30 to 39 years, and about a quarter of respondents (530; 23.1%) were in  
5 the group of 40 to 49 years. The majority of respondents 1,658 (72.4%) were female. The majority  
6 of pharmacists worked in a tertiary hospital setting (1,913; 83.5%) and had a bachelor's degree  
7 (1,487; 64.9%). Four hundred and forty-two (19.3%) of the respondents were senior pharmacists,  
8 928 (40.5%) of the respondents were pharmacists-in-charge, and 867 (37.8%) were primary  
9 pharmacists. More details regarding the demographic and professional characteristics are presented  
10 in Table 1.

For peer review only

Table 1 Comparison of the total score of knowledge and perceptions across demographic characteristics.

| Characteristics        | Frequency (%)<br>N=2291 | Total score of knowledge<br>(Mean ± SD) | P-value*       | Total score of perceptions<br>(Mean ± SD) | P-value*       | Characteristics                     | Frequency (%)<br>N=2291 | Total score of knowledge<br>(Mean ± SD) | P-value*     | Total score of perceptions<br>(Mean ± SD) | P-value* |
|------------------------|-------------------------|-----------------------------------------|----------------|-------------------------------------------|----------------|-------------------------------------|-------------------------|-----------------------------------------|--------------|-------------------------------------------|----------|
| <b>Age(y)</b>          |                         |                                         |                |                                           |                | <b>Years in practice</b>            |                         |                                         |              |                                           |          |
| 20-29                  | 377 (16.5)              | 3.50 ± 0.984                            |                | 36.85 ± 4.612                             |                | Less than 5                         | 424 (18.5)              | 3.56 ± 0.980                            |              | 36.81 ± 4.436                             |          |
| 30-39                  | 1130 (49.3)             | 3.53 ± 0.989                            |                | 37.10 ± 4.510                             |                | 6-10                                | 616 (26.9)              | 3.51 ± 0.971                            |              | 37.24 ± 4.582                             |          |
| 40-49                  | 530 (23.1)              | 3.71 ± 0.910                            | <b>0.000</b>   | 37.01 ± 4.527                             | 0.349          | 11-20                               | 632 (27.6)              | 3.55 ± 0.996                            | <b>0.008</b> | 37.02 ± 4.628                             | 0.417    |
| 50-59                  | 244 (10.7)              | 3.68 ± 0.819                            |                | 37.39 ± 4.257                             |                | 21-30                               | 424 (18.5)              | 3.70 ± 0.909                            |              | 37.04 ± 4.304                             |          |
| ≥60                    | 10 (0.4)                | 3.60 ± 0.966                            |                | 37.30 ± 4.547                             |                | More than 30                        | 195 (8.5)               | 3.68 ± 0.787                            |              | 37.27 ± 4.422                             |          |
| <b>Gender</b>          |                         |                                         |                |                                           |                | <b>Level of medical institution</b> |                         |                                         |              |                                           |          |
| Male                   | 633 (27.6)              | 3.66 ± 0.885                            | <b>0.011</b> † | 37.61 ± 4.688                             | <b>0.000</b> † | Tertiary hospital                   | 1913 (83.5)             | 3.60 ± 0.953                            | 0.071        | 37.09 ± 4.493                             | 0.148    |
| Female                 | 1658 (72.4)             | 3.55 ± 0.980                            |                | 36.86 ± 4.415                             |                | Secondary hospital                  | 254 (11.1)              | 3.45 ± 1.011                            |              | 36.65 ± 4.425                             |          |
| <b>Terminal degree</b> |                         |                                         |                |                                           |                | Community hospital                  | 27 (1.2)                | 3.48 ± 1.051                            |              |                                           |          |
| PhD                    | 81 (3.5)                | 3.75 ± 0.783                            | <b>0.002</b>   | 35.96 ± 5.009                             | 0.057          | Primary health care institution     | 97 (4.2)                | 3.65 ± 0.817                            |              | 37.89 ± 4.761                             |          |

|                            |             |              |              |               | <b>Location</b> |            |              |              |               |
|----------------------------|-------------|--------------|--------------|---------------|-----------------|------------|--------------|--------------|---------------|
| <b>Professional title</b>  |             |              |              |               | Beijing         | 551 (24.1) | 3.66 ± 0.903 |              | 37.52 ± 4.693 |
| Master                     | 460 (20.1)  | 3.75 ± 0.849 |              | 36.77 ± 4.269 | Tianjin         | 190 (8.3)  | 3.70 ± 0.902 |              | 37.55 ± 4.554 |
| Bachelor                   | 1487 (64.9) | 3.54 ± 0.973 |              | 37.23 ± 4.567 | Shanghai        | 178 (7.8)  | 3.53 ± 1.037 |              | 36.02 ± 4.929 |
| Others                     | 263 (11.5)  | 3.47 ± 1.044 |              | 36.98 ± 4.319 | Chongqing       | 102 (4.5)  | 3.75 ± 0.875 |              | 36.45 ± 4.099 |
| Chief pharmacist           | 143 (6.2)   | 3.90 ± 0.799 |              | 37.27 ± 4.344 | Shenyang        | 187 (8.2)  | 3.55 ± 0.911 |              | 37.19 ± 4.584 |
| Associate chief pharmacist | 299 (13.1)  | 3.75 ± 0.806 |              | 36.93 ± 4.334 | Dalian          | 261 (11.4) | 3.62 ± 0.952 | <b>0.000</b> | 37.67 ± 4.488 |
| Pharmacist in charge       | 928 (40.5)  | 3.61 ± 0.879 | <b>0.000</b> | 37.07 ± 4.476 | Xiamen          | 90 (3.9)   | 3.69 ± 0.895 |              | 37.27 ± 4.292 |
| Pharmacist                 | 867 (37.8)  | 3.44 ± 1.077 |              | 37.09 ± 4.607 | Guangzhou       | 159 (6.9)  | 3.58 ± 0.957 |              | 36.23 ± 4.286 |
| No title (e.g. Intern)     | 50 (2.2)    | 3.48 ± 0.974 |              | 36.92 ± 4.844 | Shenzhen        | 262 (11.4) | 3.51 ± 0.942 |              | 36.97 ± 4.754 |
| others                     | 4 (0.2)     | 4.00 ± 0.000 |              | 35.00 ± 3.162 | Chengdu         | 99 (4.3)   | 3.62 ± 0.765 |              | 36.86 ± 3.623 |
|                            |             |              |              |               | Xi-an           | 212 (9.3)  | 3.26 ± 1.182 |              | 36.52 ± 3.683 |

Bold *P*-values represent statistical significance. \**P*-value calculated using Kruskal-Wallis test. †*P*-value calculated using Mann-Whitney U test.

### 1                    1                    **Knowledge about generic drugs**

2                    2                    Knowledge of generic drugs was tested in five questions (for a total of five points), and the  
3                    3                    median knowledge score was 4.00 (mean  $\pm$  SD: 3.58  $\pm$  0.956). However, Table 1 shows statistically  
4                    4                    significant differences in knowledge scores related to variances in demographic and professional  
5                    5                    characteristics. Pharmacists within the range of 40-49 years had the highest score of knowledge  
6                    6                    (mean  $\pm$  SD: 3.71  $\pm$  0.989), followed by those of 50-59 years (mean  $\pm$  SD: 3.68  $\pm$  0.819) and more  
7                    7                    than 60 years (mean  $\pm$  SD: 3.60  $\pm$  0.966). Men scored significantly higher than women (mean: 3.66  
8                    8                    versus 3.55;  $P < 0.05$ ). Among different levels of terminal degrees and professional titles,  
9                    9                    pharmacists with doctoral degrees (mean  $\pm$  SD: 3.75  $\pm$  0.783) higher professional titles (mean  $\pm$  SD:  
10                  10                  3.90  $\pm$  0.799) were more knowledgeable of generic drugs.

11                  11                  Table 2 represents pharmacists' responses to the knowledge items. The vast majority of the  
12                  12                  respondents understood that the government has carried out the program of consistency evaluation  
13                  13                  (2,118; 92.4%), and that generic drugs selected in the national centralized procurement program  
14                  14                  have passed the consistency evaluation (2,067; 90.2%). A high percentage of pharmacists (1,718;  
15                  15                  75.0%) reported they were aware of how to identify generics that have passed consistency. However,  
16                  16                  only 225 (9.8%) pharmacists correctly identified the pharmacokinetic parameters to be assessed in  
17                  17                  determining bioequivalence per consistency evaluation. Two thousand and seventy-eight (90.7%)  
18                  18                  of pharmacists identified the correct definition of a generic drugs have the same active ingredients,  
19                  19                  dosage forms, routes of administration and therapeutic effects as the brand name drug. Associations  
20                  20                  between knowledge items and characteristics are displayed in the Supplemental file 3 Table S3.

**Table 2 Pharmacists' knowledge about generic drugs.**

| <b>Statement</b>                                                                                                                                                                                                                                                                                                                       | <b>Yes or Correct response<br/>N (%)</b> | <b>No or Incorrect response<br/>N (%)</b> | <b>Unsure<br/>N (%)</b> |
|----------------------------------------------------------------------------------------------------------------------------------------------------------------------------------------------------------------------------------------------------------------------------------------------------------------------------------------|------------------------------------------|-------------------------------------------|-------------------------|
| Were you aware that China carries out the program of quality and efficacy consistency evaluation of generic drugs?                                                                                                                                                                                                                     | 2118 (92.4)                              | 74 (3.2)                                  | 99 (4.3)                |
| Were you aware of the logo "Have passed the Consistency Evaluation" on the generic products?                                                                                                                                                                                                                                           | 1718 (75.0)                              | 320 (14.0)                                | 253 (11.0)              |
| True/False: In principle, the method of bioequivalence tests in vivo is used for Consistency Evaluation. The standard of bioequivalence is that the 90% confidence interval of the geometric mean experiment/ reference ratios for main pharmacokinetic parameters (Cmax and AUC) falls entirely within the range of 90.00% ~ 120.00%. | 225 (9.8)                                | 1666 (72.7)                               | 400 (17.5)              |
| Were you aware that all the generic drugs in national centralized procurement have passed the consistency evaluation of quality and efficacy?                                                                                                                                                                                          | 2067 (90.2)                              | 68 (3.0)                                  | 156 (6.8)               |
| True/False: The generic drugs in the national centralized procurement have the same active ingredients, dosage forms, routes of administration and therapeutic effects with the brand drugs.                                                                                                                                           | 2078 (90.7)                              | 57 (2.5)                                  | 156 (6.8)               |

1  
2  
3 **1 Perceptions towards generic substitution**

4 2 Ten items were designed to assess attitudes on generic substitution. The Cronbach's alpha  
5 3 value for perception is equal to 0.833. The total median score was calculated to be 37.00 (mean  $\pm$   
6 4 SD: 37.07  $\pm$  4.503). Men had a higher total perception score and thus more positive attitude  
7 5 regarding generic substitution ( $P < 0.001$ ; Table 1). Details on perceptions can be found in Table 3.  
8  
9  
10  
11  
12  
13  
14  
15  
16  
17  
18  
19  
20  
21  
22  
23  
24  
25  
26  
27  
28  
29  
30  
31  
32  
33  
34  
35  
36  
37  
38  
39  
40  
41  
42  
43  
44  
45  
46  
47  
48  
49  
50  
51  
52  
53  
54  
55  
56  
57  
58  
59  
60

For peer review only

**Table 3 Pharmacists' perceptions towards generic drugs.**

| <b>Statement</b>                                                                                                                                               | <b>Strongly Agree N (%)</b> | <b>Agree N (%)</b> | <b>Neutral N (%)</b> | <b>Disagree N (%)</b> | <b>Strongly Disagree N (%)</b> |
|----------------------------------------------------------------------------------------------------------------------------------------------------------------|-----------------------------|--------------------|----------------------|-----------------------|--------------------------------|
| Generic drugs that have passed the consistency evaluation are as effective as brand-name equivalents.                                                          | 361 (15.8)                  | 1179 (51.5)        | 684 (29.9)           | 58 (2.5)              | 9 (0.4)                        |
| Generic drugs that have passed the consistency evaluation are as safe as brand-name equivalents.                                                               | 355 (15.5)                  | 1226 (53.5)        | 657 (28.7)           | 50 (2.2)              | 3 (0.1)                        |
| Generic drugs that have passed the consistency evaluation are less expensive than brand-name equivalents.                                                      | 1076 (47.0)                 | 987 (43.1)         | 218 (9.5)            | 10 (0.4)              | 0 (0.0)                        |
| Generic drugs that have passed the consistency evaluation are interchangeable with brand-name drugs.                                                           | 314 (13.7)                  | 1085 (47.4)        | 784 (34.2)           | 96 (4.2)              | 12 (0.5)                       |
| Replacing brand-name drugs with generic drugs that passed the consistency evaluation may change the clinical outcomes of medication treatment.                 | 189 (8.2)                   | 615 (26.8)         | 1047 (45.7)          | 387 (16.9)            | 53 (2.3)                       |
| Application of generic drugs that passed the consistency evaluation could improve adherence to medication treatment of patients.                               | 228 (10.0)                  | 873 (38.1)         | 1005 (43.9)          | 169 (7.4)             | 16 (0.7)                       |
| Health providers need to explain detailed information about generic drugs to patients in order to ensure that they correctly understand and use generic drugs. | 640 (27.9)                  | 1369 (59.8)        | 258 (11.3)           | 20 (0.9)              | 4 (0.2)                        |
| Generic drugs can be exempted from clinical trials for approval if they passed bioequivalence trials in vivo.                                                  | 191 (8.3)                   | 510 (22.3)         | 759 (33.1)           | 673 (29.4)            | 158 (6.9)                      |
| Relevant organizations should formulate and issue standard guidelines for generic substitution.                                                                | 661 (28.9)                  | 1312 (57.3)        | 296 (12.9)           | 20 (0.9)              | 2 (0.1)                        |
| I support the current policy of substituting brand-name drugs with generic drugs that have passed the consistency evaluation.                                  | 409 (17.9)                  | 1225 (53.5)        | 619 (27.0)           | 32 (1.4)              | 6 (0.3)                        |

1  
2  
3  
4  
5  
6  
7  
8  
9  
10  
11  
12  
13  
14  
15  
16  
17  
18  
19  
20  
21  
22  
23  
24  
25  
26  
27  
28  
29  
30  
31  
32  
33  
34  
35  
36  
37  
38  
39  
40  
41  
42  
43  
44  
45  
46  
47  
48  
49  
50  
51  
52  
53  
54  
55  
56  
57  
58  
59  
60

1 About two-thirds of the respondents agreed that generic drugs that passed the consistency  
2 evaluation were as efficacious (1,540; 67.3%) or as safe (1,581; 69.0%) as the brand-name  
3 equivalent. A total of 2,063 (90.1%) respondents reported that generic drugs have significant cost-  
4 minimizing advantages over the brand-name drugs. One thousand and three hundred ninety-nine  
5 (61.1%) pharmacists were of the opinion that generic drugs that passed the consistency evaluation  
6 were interchangeable with the brand-name drugs; while 784 (34.2%) pharmacists held a neutral  
7 attitude towards interchangeability. Furthermore, 804 (35.0%) respondents believed that replacing  
8 the brand-name drugs with generic drugs may change clinical outcomes of medication treatment.

9 With regard to medication adherence, 1,101 (48.1%) respondents stated that the use of generic  
10 drugs could improve adherence to medication, but 1,005 (43.9%) respondents were neutral on this.  
11 A large percentage of respondents (2,009; 87.7%) recognized the importance of explaining detailed  
12 information about generic drugs to patients. While, a similar percentage of respondents (1,973;  
13 86.2%) highlighted the need for standard guidelines for generic substitution, 701 (30.6%) thought  
14 that drugs that pass bioequivalence trials *in vivo* should be exempted from additional clinical trials  
15 before marketing. Seven hundred and fifty-nine (33.1%) pharmacists were neutral about this, and  
16 831 (36.3%) disagreed. A large number of participant pharmacists (1,634; 71.4%) supported the  
17 national policy of generic substitution. A statistically significant association was found between  
18 geographic location and supportive attitudes toward generic substitution ( $P < 0.001$ ), see  
19 Supplemental file 3 Table S4. The highest percentage of pharmacists in favor of generic substitution  
20 were from Xiamen (78.9%), followed by Tianjin (77.4%) and Beijing (76.8%), while the lowest  
21 percentage were from Shanghai (53.3%) (see Supplemental file 3 Table S5).

22 A significant positive correlation was observed between pharmacists' perception on the  
23 efficacy and safety ( $\rho=0.761$ ;  $P<0.001$ ). The positive attitude towards either efficacy ( $\rho=0.681$ ;  
24  $P<0.001$ ) or safety ( $\rho=0.640$ ;  $P<0.001$ ) of generic drugs was associated with generic  
25 interchangeability. There were also significant associations between generic interchangeability and  
26 support for generic substitution ( $\rho=0.602$ ;  $P<0.001$ ). In addition, a significant positive correlation  
27 was demonstrated between total knowledge score and total perception score ( $\rho= 0.267$ ;  $P < 0.001$ ).

### 28 **Practices on generic substitution**

29 A total of 1,850 (80.8%) pharmacists noted increased use of generic drugs in their medical  
30 institutions, of whom 1046 (45.7%) reported a dramatically increased trend. Table 4 illustrates  
31 possible influencing factors related to dispensing and selection of generic drugs; most pharmacist  
32 respondents reported that the three main factors affecting their willingness to dispense generic drugs  
33 were efficacy (25.0%), safety (19.2%), and the direction of national policies and hospital regulations  
34 (18.7%).

35 Pharmacists reported that they think the top three factors patients considered when selecting  
36 generic drugs were efficacy of generic drugs (23.9%), preferences for brand-name drugs and  
37 medication habits (19.9%), and safety of generic drugs (17.4%). The most commonly cited  
38 difficulties in implementation of the centralized procurement and use of generic drugs were lack of  
39 trust in efficacy and safety (31.0%), challenge to change patients' preference (29.0%), and lack of  
40 time to provide patient education (23.6%). Suggestions for promoting generic substitution included  
41 encouraging generic substitution by health insurance policies (27.6%), publicizing these policies  
42 (25.5%), and educating health providers about generics and guidelines regarding their use (21.1%).



**Table 4 Generic substitution practices.**

| Item                                                                                                                                                           | Statement                                                       | N (%)       |
|----------------------------------------------------------------------------------------------------------------------------------------------------------------|-----------------------------------------------------------------|-------------|
| How has the amount of generic drugs used in your medical institution changed after the implementation of national centralized procurement of drugs?            | Significantly increased                                         | 1046 (45.7) |
|                                                                                                                                                                | Increased somewhat                                              | 805 (35.1)  |
|                                                                                                                                                                | Basically unchanged                                             | 163 (7.1)   |
|                                                                                                                                                                | Decreased                                                       | 23 (1.0)    |
|                                                                                                                                                                | Unsure                                                          | 254 (11.1)  |
| What factors do you think affect the selection of generic drugs? Please select the top 3 important items.                                                      | National policies and hospital regulations                      | 1284 (18.7) |
|                                                                                                                                                                | Efficacy of generic drugs                                       | 1716 (25.0) |
|                                                                                                                                                                | Safety of generic drugs                                         | 1321 (19.2) |
|                                                                                                                                                                | Economy of generic drugs                                        | 686 (10.0)  |
|                                                                                                                                                                | Accessibility of generic drugs and brand-name drugs             | 350 (5.1)   |
|                                                                                                                                                                | Physicians' clinical expertise in medication treatment          | 324 (4.7)   |
|                                                                                                                                                                | Patient's financial burden                                      | 357 (5.2)   |
|                                                                                                                                                                | Patients' willingness and preferences                           | 548 (8.0)   |
|                                                                                                                                                                | Promotion of drug representatives                               | 94 (1.4)    |
|                                                                                                                                                                | Reputation of generic drugs manufacturers                       | 182 (2.6)   |
| What factors do you think affect patients' choice of selecting generic drugs in the national centralized procurement? Please select the top 3 important items. | Others                                                          | 11 (0.2)    |
|                                                                                                                                                                | Patients' preference for brand-name drugs and medication habits | 1368 (19.9) |
|                                                                                                                                                                | Efficacy of generic drugs                                       | 1641 (23.9) |
|                                                                                                                                                                | Safety of generic drugs                                         | 1198 (17.4) |
|                                                                                                                                                                | Out-of-pockets cost of drugs                                    | 737 (10.7)  |
|                                                                                                                                                                | Patient's financial burden                                      | 888 (12.9)  |
|                                                                                                                                                                | Physicians' suggestions                                         | 625 (9.1)   |
|                                                                                                                                                                | National policies                                               | 412 (6.0)   |
| Others                                                                                                                                                         | 4 (0.1)                                                         |             |

1  
2  
3  
4  
5  
6  
7  
8  
9  
10  
11  
12  
13  
14  
15  
16  
17  
18  
19  
20  
21  
22  
23  
24  
25  
26  
27  
28  
29  
30  
31  
32  
33  
34  
35  
36  
37  
38  
39  
40  
41  
42  
43  
44  
45  
46

What do you think is the largest challenge in implementing the national centralized procurement and use of generic drugs? Please select the top 3 important items.

- There is no enough time to explain details to patients. 1621 (23.6)
- It is difficult to change patients' preference. 1992 (29.0)
- Lack of trust in the efficacy and safety of generic drugs. 2134 (31.0)
- There is an increased risk of errors in dispensing drugs. 529 (7.7)
- There is an increased cost in maintenance and manpower. 558 (8.1)
- Others 39 (0.6)

What measures should be taken to promote the national centralized procurement and use of generic drugs? Please select the top 3 important items.

- Encourage patients to use generic drugs by use of health insurance policies. 1899 (27.6)
- Increase publicity of centralized procurement policies. 1751 (25.5)
- Educate health providers on centralized procurement policies and information about selected drugs. 1450 (21.1)
- Medical institutions should restrict the use of the brand-name drugs with the same generic name, and retain only the selected generic drugs. 513 (7.5)
- Medical institutions should restrict the use of all brand-name drugs with the same pharmacological action. 271 (3.9)
- Standard guidelines on generic substitution should be issued. 942 (13.7)
- Others 47 (0.7)

## 1 Discussion

2 This cross-sectional study is one of the few surveys evaluating the knowledge, perceptions,  
3 and practices of pharmacists regarding generic drugs after implementing the national centralized  
4 procurement in China. The Cronbach's alpha value for perception is equal to 0.833, indicating a  
5 good level of reliability. The total knowledge score ( $P<0.05$ ) and the total perception score ( $P<0.05$ )  
6 were proven non-normally distributed using Kolmogorov-Smirnov test. Mann-Whitney-U or  
7 Kruskal-Wallis tests were used to compare differences.

8 This survey recruited a large number of respondents. In general, pharmacists had fair amount  
9 of knowledge regarding consistency evaluation and the definition of generic drugs. It appears that  
10 Chinese pharmacists are generally supportive of generic substitution; although, they still  
11 acknowledge some reservations regarding the quality, efficacy and safety of generic drugs.  
12 Measures such as encouraging generic substitution by health insurance programs, publicizing  
13 generic drugs policies, educating health providers about generics and guidelines regarding their use  
14 should be taken to promote generic substitution.

15 In this study, more than 90% of the respondents were aware of the definition of generic drugs.  
16 This was higher than some published studies, in other countries, like Poland,<sup>[29]</sup> Pakistan,<sup>[30]</sup>  
17 Malaysia,<sup>[31]</sup> and New Zealand.<sup>[32]</sup> In our study, few respondents (9.8%) identified the correct  
18 criteria for bioequivalence. This lack of knowledge on the robustness of regulatory requirements  
19 may lead to less confidence in the quality of generic drugs. In studies set in Palestine and US,  
20 community pharmacists were asked to identify the correct Food and Drug Administration (FDA)  
21 acceptance criteria for bioequivalence; a similar percentage of community pharmacists (12.6% vs  
22 7.3%) provided the correct answer.<sup>[23, 33]</sup> Nearly 30% of respondents had a neutral attitude towards  
23 efficacy (29.9%), safety (28.7%) of generic drugs, and interchangeability with brand-name  
24 equivalents (34.2%). The reason may be that the quality of generic drugs may not be clearly evident  
25 in pharmacists' clinical practice sites since generic substitution had only been implemented for one  
26 year. Seventy one percent of Chinese pharmacists surveyed supported the national policy of generic  
27 substitution. These results were similar to various studies conducted in Iran (71.6%),<sup>[34]</sup> Poland  
28 (67.1%),<sup>[29]</sup> Saudi Arabia (68.5%),<sup>[22]</sup> Lebanon (64%),<sup>[35]</sup> while lower than that in Australia (93.7%),  
29 <sup>[36]</sup>Nigeria (92.9%),<sup>[37]</sup> French (90%),<sup>[38]</sup> Ireland (80%).<sup>[39]</sup>

30 It was interesting to find a significant positive correlation between total knowledge score  
31 regarding generics and total perception score, indicating that pharmacists who are more  
32 knowledgeable in generic drugs may hold a more supportive attitude towards generic substitution.  
33 This may suggest the importance of mass educational effort among pharmacists. More information  
34 on the issues of generic drugs makes pharmacists confident in using and dispensing those products.  
35 Besides, significant differences were observed by location in both knowledge and perception, which  
36 could lead to locational differences in the implementation of the generic substitution policy.

37 In more recent years, China has made a significant effort to promote generic substitution. The  
38 NMPA requires that generic drugs approved before 2007 must be proved bioequivalent with brand  
39 innovators by the end of 2021. Drug products that have not passed the consistency evaluation will  
40 no longer be selected for the national centralized drug procurement if more than three other generic  
41 drug manufacturers have passed. On average drug prices dramatically decreased by 52% of the  
42 selected drugs because of price negotiations and volume-based national centralized drug  
43 procurement.<sup>[40]</sup> In 2017, NMPA published Approved Drug Lists in China, similar to the U.S.'s

1  
2  
3 1 Orange Book, this list includes 17 varieties of approved generic drugs passed the consistency  
4 2 evaluation. Pharmaceutically equivalent products and therapeutically equivalent products are  
5 3 clearly coded in this list. However, further steps need to be taken to educate pharmacists.

6 4 To correct misconceptions on generic drugs, the NMPA should ensure that generic drugs meet  
7 5 quality standards by using the Good Manufacturing Practices. The generic drug approval process  
8 6 should be rigorous and transparent to the public. Negative perceptions and skepticisms can be  
9 7 reduced through education that will create more awareness about generic drugs and the importance  
10 8 of generic substitution among healthcare providers and patients. As some studies have demonstrated,  
11 9 information with regard to generic substitution should be taught in college curricula to better prepare  
12 10 healthcare providers for future work.<sup>[22, 31, 41-47]</sup>

13 11 One proposed measure that could be implemented to promote rational use of generic drugs is  
14 12 the establishment of standard operating procedures for generic substitution and formulary of the  
15 13 medical institutions.<sup>[31]</sup> Currently, generic drug use has been greatly encouraged in public hospitals  
16 14 in the 11 pilot locations. Although this national centralized procurement brought tremendous use of  
17 15 generic drugs, physicians tend to veer towards using brand-name drugs with the same  
18 16 pharmacological action when one brand-name drug was not accessible. A small number of our  
19 17 survey respondents agreed that in order to promote generic substitution medical institutions should  
20 18 restrict the use of brand-name drugs 513 (22.4%) and 271 (11.8%) responded that hospitals should  
21 19 only retain the corresponding generic drugs or drugs in the same pharmacologic drug class.

22 20 In this survey, only a few pharmacists reported other factors influencing patients' acceptance  
23 21 of generic substitution, such as patients' financial burden (12.9%), out-of-pockets cost of drugs  
24 22 (10.7%) and physicians' suggestions (9.1%). Currently, generic substitution has been supported by  
25 23 several Chinese health insurers, providing greater reimbursement for generic drugs (versus brand-  
26 24 name drugs). Many countries enacted generic drugs prices and reimbursement policy to promote  
27 25 generic substitution.<sup>[3, 4, 48-51]</sup> The survey respondents were from well-developed cities in China, so  
28 26 the difference in drug cost may not have been a barrier for these patients. However, cost-saving  
29 27 factor may be pivotal for patients in lower-income areas. A nationwide study conducted in  
30 28 Australian pharmacies demonstrated that the pharmacists' generic substitution recommendation rate  
31 29 in urban and rural areas was significantly higher than remote areas, while the patients' acceptance  
32 30 rate in remote areas was significantly higher than rural and urban areas.<sup>[52]</sup> Therefore, cost may not  
33 31 be the only incentive that should be offered to encourage generic substitution in high incomes aeras.  
34 32 In our study some of the respondents proposed that supply issues for generic drugs resulted in  
35 33 frequent medication changes and poor medication adherence. Therefore, supply guarantee of  
36 34 selected drugs and sustainability of formulary in the national procurement should be strengthened.  
37 35 The government should formulate regulations or acts for consistency evaluation of generic drugs  
38 36 and rigid quality supervision.

39 37 Pharmacists play a key role in managing rational use of medications, balancing between  
40 38 efficacy, safety and economic use of drugs. Pharmacotherapy monitoring and adverse drug reaction  
41 39 reporting should be emphasized to identify safety concerns regarding generic drugs. It is important  
42 40 for pharmacists to provide proper education to prevent patient confusion related to generic  
43 41 substitution and thus improve patient adherence. Pharmacists should also provide education and  
44 42 guidance to physicians and consumers on proper use of generic drugs. Only by understanding and  
45 43 appreciating the quality of generic drugs can patients and physicians have full confidence in generic  
46 44 substitution. Therefore, attitudes of pharmacists may be a crucial factor affecting the acceptance of

1  
2  
3  
4 1 generics by both physicians and patients. Three systematic reviews identified that a significant  
5 2 proportion of physicians, pharmacists and patients hold negative perceptions of generic drugs,  
6 3 perceiving generics as less effective, less safe, and inferior in quality.<sup>[25-27]</sup> Physicians and patients  
7 4 expressed more negative opinions than pharmacists. All these publications indicated that negative  
8 5 attitudes present barriers to the generic substitution, and education of stakeholders was a  
9 6 requirement for increased usage of generics.

10 7 In some states in the U.S., pharmacists must substitute a generically equivalent drug if available.  
11 8 Other states allow the pharmacists to decide to provide substitution – if not otherwise indicated by  
12 9 the physician. And still other states impose an additional restriction that require pharmacists to  
13 10 obtain patients' consent before substituting with a generic product.<sup>[53-55]</sup> A study investigated the  
14 11 effects of state-level pharmacist regulations on generic substitution of prescription drugs and  
15 12 conclude that mandates generic substitution by pharmacists was found to have an insignificant  
16 13 effect.<sup>[55]</sup> A review on pharmaceutical regulation in 15 European countries demonstrated that  
17 14 pharmacists are entitled to substitution in Denmark, Germany, Ireland, Poland, and United Kingdom.  
18 15 Generic substitution are even mandatory for pharmacists in Belgium, Finland, Greece, Italy,  
19 16 Netherlands, Portugal, Spain, and Sweden, and incentivized in France.<sup>[51]</sup> Several studies from  
20 17 Lebanon, Palestine and Qatar concluded pharmacists should have authority to perform generic  
21 18 substitution without consulting the prescribing physician.<sup>[23, 35, 56]</sup> However, pharmacists do not have  
22 19 authority to modify medication orders to allow for substitution in China, they usually dispense drugs  
23 20 according to medical prescription, thus further progress needs to be made to improve this situation.  
24 21 We believe pharmacists may be authorized in implementing generic substitution for any medication  
25 22 in future.

26 23 There are some limitations for this research. This study was performed in 11 locations in China,  
27 24 and most respondents were from large public hospitals; therefore, findings cannot be generalized to  
28 25 pharmacists practicing in other cities in China. The survey had a limited access to pharmacists in  
29 26 community settings or rural areas. This also limits generalizability of the findings. The data were  
30 27 not collected from a random sample, which may weaken the representativeness and the results on  
31 28 the statistical significance of the differences and correlations presented about the data. Moreover,  
32 29 because of the web-based sample survey tool, we cannot compute a response rate to the  
33 30 questionnaire and adjust for possible non-response bias. In addition, due to the self-administered  
34 31 format of questionnaires, we cannot rule out the possibility of social desirability bias because the  
35 32 content of questionnaires about generic substitution correlates to the national policies and politics  
36 33 as well as the knowledge scores represent the respondents' perception.

37 34 This survey can serve as a preliminary study and is helpful in understanding the knowledge  
38 35 and perceptions of pharmacists on issues pertaining to generic drugs, and exploring the factors  
39 36 hindering and favoring generic substitution in China. The current findings have important  
40 37 implications in continuous improvement of generic drugs policy and its implementation. Future  
41 38 research is needed to explore physicians' and patients' perceptions and practices regarding the  
42 39 establishment of national centralized procurement and generic substitution program in China.  
43 40 Generic drugs on the market are required to be bioequivalent to the reference product; however,  
44 41 their therapeutic equivalence may not necessarily be identical, especially for narrow therapeutic  
45 42 index drugs.<sup>[47, 57-60]</sup> Therefore, evidence of the efficacy and safety of generic drugs should be  
46 43 obtained from real-world studies to prove therapeutic equivalence.

## 1 **Conclusion**

2 The study concluded that Chinese pharmacists have a fairly good knowledge of generic drugs  
3 used in the national centralized procurement program and generally have positive attitudes towards  
4 generic substitution. The main obstacle for further utilization of generic drugs is lack of trust in  
5 efficacy and safety. Education and awareness of generic substitution should be promoted and clear  
6 standard guidelines need to be created. All these issues need to be addressed for the realization of  
7 the true value of generic drugs as part of the country's healthcare cost-containment strategy as well  
8 as the implementation of generic substitution policy in China.

## 9 **Acknowledgments**

10 The authors would like to thank all the pharmacists who participated in the study. The authors  
11 would also like to express their gratitude to all the experts and researchers for providing feedback  
12 on this questionnaire.

## 13 **Funding**

14 This study was partially funded by Peking Pharmacological Society. The funders had no role  
15 in study design, data collection and analysis, decision to publish or preparation of the manuscript.

## 16 **Author contributions**

17 J.Q. led the overall study design, conducted the statistical analyses, interpreted the data, and  
18 wrote the first draft of the manuscript. W.Z. and B.Z. made the study design, collected the data,  
19 contributed to interpretation of findings and edited the manuscript. S.W., L.D., X.L., Y.G., J.L.,  
20 X.D., and D.M. were involved in the design of the questionnaire. H.P., L.D., X.D., and D.M.  
21 participated in distributing the questionnaire. R.L.T., K.W.S., and S.L. contributed to editing the  
22 manuscript and interpretation of findings. All the authors read, made comments on manuscripts,  
23 approved the final manuscript and agreed on its submission.

## 24 **Conflicts of Interest**

25 The authors declare that they have no competing interest.

## 26 **Ethical approval**

27 The study was approved by the Institutional Review Board (IRB) of Peking Union Medical  
28 College Hospital in China (IRB#: S-K1136) and St. Louis College of Pharmacy in the USA (IRB#:  
29 2020-18). Anonymity was ensured by gathering and analyzing data in aggregate and only allowing  
30 members of the research team access to the password-protected data.

## 31 **Data availability statement**

32 Data are available on reasonable request. The data generated and/or analyzed during the present  
33 study are not publicly available, but they are available from the corresponding author on reasonable  
34 request.

## 35 **Supplemental files**

36 Supplemental file 1. Table S1. Demographic characteristics of pharmacists in the pilot study.  
37 Table S2. Data of the pilot study.

38 Supplemental file 2. The final version of questionnaire.

39 Supplemental file 3. Table S3. Association between pharmacists' knowledge and demographic  
40 characteristics. Table S4. Association between pharmacists' perception and demographic  
41 characteristics. Table S5. Crosstabs between support for generic substitution and locations.



## References

1. Squires D, Anderson C. U.S. health care from a global perspective: spending, use of services, prices, and health in 13 countries. *Issue Brief (Commonw Fund)*. 2015;15:1-15.
2. Hassali MA, Alrasheedy AA, McLachlan A, *et al*. The experiences of implementing generic medicine policy in eight countries: A review and recommendations for a successful promotion of generic medicine use. *Saudi Pharm J*. 2014;22(6):491-503.
3. Wouters OJ, Kanavos PG, McKEE M. Comparing Generic Drug Markets in Europe and the United States: Prices, Volumes, and Spending. *Milbank Q*. 2017;95(3):554-601.
4. Wouters OJ, Kanavos PG. A comparison of generic drug prices in seven European countries: a methodological analysis. *BMC Health Serv Res*. 2017;17(1):242. Published 2017 Mar 31. doi:10.1186/s12913-017-2184-5.
5. Vogler S, Paris V, Ferrario A, *et al*. How Can Pricing and Reimbursement Policies Improve Affordable Access to Medicines? Lessons Learned from European Countries. *Appl Health Econ Health Policy*. 2017;15(3):307-321.
6. World Health Organization. Multisource (Generic) Pharmaceutical Products: Guidelines on Registration Requirements to Establish Interchangeability. Available online: 2005[http://www.who.int/medicines/services/expertcommittees/pharmprep/QAS04\\_093Rev4\\_final.pdf](http://www.who.int/medicines/services/expertcommittees/pharmprep/QAS04_093Rev4_final.pdf), (accessed on 9th April 2020).
7. Posner J, Griffin JP. Generic substitution. *British Journal of Clinical Pharmacology*, 2011;72(5):731-2.
8. National Health Commission. Chinese Health Statistics Yearbook 2019. *National Bureau of Statistics: Beijing, China, 2020*.
9. Yip W, Fu H, Chen A T, *et al*. 10 years of health-care reform in China: progress and gaps in Universal Health Coverage. *The Lancet*, 2019, 394(10204):1192-1204.
10. Manning N. The Reform of Health Policy in China – Left Behind in the Race to Industrialize?. *Social Policy & Administration*, 2011, 45(6):649-661.
11. Cameron A, Mantel-Teeuwisse AK, Leufkens HG, *et al*. Switching from originator brand medicines to generic equivalents in selected developing countries: how much could be saved?. *Value Health*. 2012;15(5):664-673.
12. Hu L, Yu Z, Yuan Q, *et al*. Opportunities and Challenges of Multinational Pharmaceutical Enterprises in Transforming Pharmaceutical Market in China. *Ther Innov Regul Sci*. 2019;53(2):207-214.
13. Huang B, Barber SL, Xu M, *et al*. Make up a missed lesson-New policy to ensure the interchangeability of generic drugs in China. *Pharmacol Res Perspect*. 2017;5(3):e00318.
14. Lulin Z, Antwi HA, Wang W, *et al*. The effect of herd formation among healthcare investors on health sector growth in China. *Int J Equity Health*. 2016;15:113.
15. Zuo J, Gao Y, Bou-Chacra N, *et al*. Challenges and Opportunities to Use Biowaivers to Compare Generics in China. *AAPS PharmSciTech*, 2014, 15(5):1070-1075.
16. China Food and Drug Administration. Evaluation scheme of generic quality consistency. China Food and Drug Administration.2013. Available online: <http://www.nmpa.gov.cn/WS04/CL2196/323980.html>. (accessed on 31st May 2020).
17. State Council of the People's Republic of China. Notification on the carrying out consistency evaluation of the quality and efficacy of generic drugs. Available online:

- 1  
2  
3  
4 1 [http://www.gov.cn/zhengce/content/2016-03/05/content\\_5049364.htm](http://www.gov.cn/zhengce/content/2016-03/05/content_5049364.htm). (accessed on 31st May  
5 2 2020).  
6 3 18. National Medical Products Administration. Guidelines on statistical analysis in bioequivalence  
7 4 studies and technology in bioequivalence studies of high-variation drugs. Available online:  
8 5 <http://www.nmpa.gov.cn/WS04/CL2138/331454.html>. (accessed on 31st May 2020).  
9 6 19. State Council Information Office. Regular meeting on the State Council policy on 27th,  
10 7 November,2019. Available online: [http://www.nhc.gov.cn/xcs/s7847/201911/dad7e0b2a26a4](http://www.nhc.gov.cn/xcs/s7847/201911/dad7e0b2a26a4f56bd68836d33ab2fe2.shtml)  
11 8 [f56bd68836d33ab2fe2.shtml](http://www.nhc.gov.cn/xcs/s7847/201911/dad7e0b2a26a4f56bd68836d33ab2fe2.shtml). (accessed on 8th August 2020).  
12 9 20. Analysis and prediction of China's generic drug industry development status and scale in 2020.  
13 10 <https://www.chyxx.com/industry/202005/860003.html>. (accessed on 26th August 2021)  
14 11 21. WANG Y, XU W, LU N, *et al*. Analysis of the effect of “4 + 7” centralized procurement  
15 12 policy implementation: Based on the drug sales data of 9 pilot regions. *Chinese Journal of*  
16 13 *Health Policy*,2021,14(2).  
17 14 22. Ikhzaee FS, Almalki HM, Attar AY, *et al*. Evaluating community pharmacists' perspectives  
18 15 and practices concerning generic medicines substitution in Saudi Arabia: A cross-sectional  
19 16 study. *Health Policy*. 2016;120(12):1412-1419.  
20 17 23. Shraim NY, Al Taha TA, Qawasmeh RF, *et al*. Knowledge, attitudes and practices of  
21 18 community pharmacists on generic medicines in Palestine: a cross-sectional study. *BMC*  
22 19 *Health Serv Res*. 2017;17(1):847.  
23 20 24. Tsaprantzi AV, Kostagiolas P, Platis C, *et al*. The Impact of Information on Doctors' Attitudes  
24 21 Toward Generic Drugs. *Inquiry*. 2016 Mar 31;53:0046958016637791.  
25 22 25. Colgan S, Faasse K, Martin LR, *et al*. Perceptions of generic medication in the general  
26 23 population, doctors and pharmacists: a systematic review. *BMJ Open*. 2015;5:e008915.  
27 24 26. Toverud E-L, Hartmann K, Hakonsen H. A systematic review of physicians' and pharmacists'  
28 25 perspectives on generic drug use: What are the global challenges? *Appl Health Econ Health*  
29 26 *Policy*. 2015;13(Suppl 1):S35-S45.  
30 27 27. Dunne SS, Dunne CP. What do people really think of generic medicines? A systematic review  
31 28 and critical appraisal of literature on stakeholder perceptions of generic drugs. *BMC Med*. 2015  
32 29 Jul 29;13:173.  
33 30 28. Dunne SS. What Do Users of Generic Medicines Think of Them? A Systematic Review of  
34 31 Consumers' and Patients' Perceptions of, and Experiences with, Generic Medicines. *Patient*.  
35 32 2016 Dec;9(6):499-510.  
36 33 29. Drozdowska A, Hermanowski T. Exploring factors underlying the attitude of community  
37 34 pharmacists to generic substitution: a nationwide study from Poland. *International Journal of*  
38 35 *Clinical Pharmacy*, 2016, 38(1):162-170.  
39 36 30. Jamshed S, Hassali M, Ibrahim M, *et al*. Knowledge, perception and attitude of community  
40 37 pharmacists towards generic medicines in Karachi, Pakistan: a qualitative insight. *Trop J*  
41 38 *Pharm Res*. 2010;9(4).  
42 39 31. Chua GN, Hassali MA, Shafie AA, *et al*. A survey exploring knowledge and perceptions of  
43 40 general practitioners towards the use of generic medicines in the northern state of Malaysia.  
44 41 *Health policy*.2010;95(2-3):229-35.  
45 42 32. Babar ZU, Grover P, Stewart J, *et al*. Evaluating pharmacists' views, knowledge, and  
46 43 perception regarding generic medicines in New Zealand. *Res Social Adm Pharm*. 2011  
47 44 Sep;7(3):294-305.



- 1  
2  
3  
4  
5  
6  
7  
8  
9  
10  
11  
12  
13  
14  
15  
16  
17  
18  
19  
20  
21  
22  
23  
24  
25  
26  
27  
28  
29  
30  
31  
32  
33  
34  
35  
36  
37  
38  
39  
40  
41  
42  
43  
44  
45  
46  
47  
48  
49  
50  
51  
52  
53  
54  
55  
56  
57  
58  
59  
60
- 1 33. Euen BJ, Fadda HM. Community pharmacists' understanding and perceptions of FDA therapeutic equivalence standards. *Res Social Adm Pharm*. 2019 Jan;15(1):77-83.
  - 2 34. Nazila Y, Gholamhossein M, Farzad P, *et al*. Generic substitution policy implementation: A pharmacists' perspective survey. *Journal of generic medicines*. 2015.
  - 3 35. El-Jardali F, Fadlallah R, Morsi RZ, *et al*. Pharmacists' views and reported practices in relation to a new generic drug substitution policy in Lebanon: a mixed methods study. *Implement Sci*. 2017;12(1):23.
  - 4 36. Ping CC, March G, Clark A, *et al*. A Web-Based Survey on Australian Community Pharmacists' Perceptions and Practices of Generic Substitution. *Journal of Generic Medicines*. 2010;7(4):342-353.
  - 5 37. Auta A, Bala ET, Shalkur D. Generic medicine substitution: a cross-sectional survey of the perception of pharmacists in North-Central, Nigeria. *Med Princ Pract*. 2014;23(1):53-8.
  - 6 38. Allenet B, Barry H. Opinion and behaviour of pharmacists towards the substitution of branded drugs by generic drugs: survey of 1,000 French community pharmacists. *Pharm World Sci*. 2003 Oct;25(5):197-202.
  - 7 39. Dunne SS, Shannon B, Cullen W, *et al*. Perceptions and attitudes of community pharmacists towards generic medicines. *J Manag Care Spec Pharm*. 2014 Nov;20(11):1138-46.
  - 8 40. China Daily. China to further pilot medicine procurement program. Available online: <https://www.chinadaily.com.cn/a/201904/04/WS5ca5fe88a3104842260b4844.html>. (accessed on 8th August 2020).
  - 9 41. Shrank WH, Liberman JN, Fischer MA, *et al*. Physician perceptions about generic drugs. *Ann Pharmacother* 2011;45:31-8.
  - 10 42. Al-Tamimi SK, *et al*. The need to incorporate generic medicines topic in the curriculum of Yemeni pharmacy colleges. *Int J Pharm Pract*. 2016;24(1):72-3.
  - 11 43. Alrasheedy AA, Hassali MA, Aljadhey H, *et al*. The need to cover generic medications and generic substitution practice in the curricula of pharmacy colleges in Saudi Arabia. *Am J Pharm Educ*. 2014;78(5):108.
  - 12 44. Domeyer PJ, Aletras V, Anagnostopoulos F, *et al*. Development and validation of a tool to assess knowledge and attitudes towards generic medicines among students in Greece: The ATtitude TOwards GENerics (ATTOGEN) questionnaire. *PLoS One*. 2017 Nov 29;12(11):e0188484.
  - 13 45. Domeyer PJ, Katsari V, Sarafis P, *et al*. Greek students' attitudes, perception and knowledge regarding generic medicines in times of economic crisis: a cross-sectional study. *BMC Med Educ*. 2018 Nov 15;18(1):262.
  - 14 46. James PB, Bah AJ, Margao EK, *et al*. Exploring the Knowledge and Perception of Generic Medicines among Final Year Undergraduate Medical, Pharmacy, and Nursing Students in Sierra Leone: A Comparative Cross-Sectional Approach. *Pharmacy (Basel)*. 2018 Jan 4;6(1):3.
  - 15 47. Chong CP, Hassali MA, Bahari MB, *et al*. Exploring community pharmacists' views on generic medicines: a nationwide study from Malaysia. *Int J Clin Pharm*. 2011 Feb;33(1):124-31.
  - 16 48. Mansfield SJ. Generic drug prices and policy in Australia: room for improvement? a comparative analysis with England. *Aust Health Rev*. 2014 Feb;38(1):6-15.
  - 17 49. Ferrario A, Dedet G, Humbert T, *et al*. Strategies to achieve fairer prices for generic and biosimilar medicines. *BMJ*. 2020 Jan 13;368:15444.

- 1  
2  
3  
4 1 50. Rodwin MA. How the United Kingdom Controls Pharmaceutical Prices and Spending:  
5 2 Learning From Its Experience. *Int J Health Serv*. 2021 Apr;51(2):229-237.  
6 3 51. Panteli D, Arickx F, Cleemput I, *et al*. Pharmaceutical regulation in 15 European countries  
7 4 review. *Health Syst Transit*. 2016 Oct;18(5):1-122.  
8 5 52. Chong CP, March G, Clark A, *et al*. A nationwide study on generic medicines substitution  
9 6 practices of Australian community pharmacists and patient acceptance. *Health Policy*. 2011  
10 7 Feb;99(2):139-48.  
11 8 53. Assistant Secretary for Planning and Evaluation (ASPE) U.S. Department of Health and  
12 9 Human Services. Expanding the use of generic drugs. Available online:  
13 10 <https://aspe.hhs.gov/basic-report/expanding-use-generic-drugs#Legislative>. (accessed on 21st  
14 11 June 2020).  
15 12 54. Darrow JJ, Chong JE, Kesselheim AS. Reconsidering the scope of US state laws allowing  
16 13 pharmacist substitution of generic drugs. *BMJ*. 2020 Jun 23;369:m2236.  
17 14 55. Song Y, Barthold D. The effects of state-level pharmacist regulations on generic substitution  
18 15 of prescription drugs. *Health Econ*. 2018 Nov;27(11):1717-1737.  
19 16 56. Awaisu A, Kheir N, Ibrahim MI, *et al*. Knowledge, attitudes, and practices of community  
20 17 pharmacists on generic medicines in Qatar. *Int J Clin Pharm*, 2014;36(2):394–404.  
21 18 57. Sarpatwari A, Lee MP, Gagne JJ, *et al*. Generic Versions of Narrow Therapeutic Index Drugs:  
22 19 A National Survey of Pharmacists' Substitution Beliefs and Practices. *Clin Pharmacol Ther*.  
23 20 2018 Jun;103(6):1093-1099.  
24 21 58. Atif M, Azeem M, Sarwar MR. Potential problems and recommendations regarding  
25 22 substitution of generic antiepileptic drugs: a systematic review of literature. *Springer plus*.  
26 23 2016 Feb 25;5:182.  
27 24 59. Dunne S, Shannon B, Hannigan A, *et al*. Physician and pharmacist perceptions of generic  
28 25 medicines: What they think and how they differ. *Health Policy*. 2014.  
29 26 60. Yamada M, Welty TE. Generic substitution of antiepileptic drugs: a systematic review of  
30 27 prospective and retrospective studies. *Ann Pharmacother*. 2011 Nov;45(11):1406-15.  
31  
32  
33  
34  
35  
36  
37  
38  
39  
40  
41  
42  
43  
44  
45  
46  
47  
48  
49  
50  
51  
52  
53  
54  
55  
56  
57  
58  
59  
60

## Supplemental file 1

Table S1. Demographic characteristics of pharmacists in the pilot study.

| Characteristics            | Pharmacists<br>N=20 |
|----------------------------|---------------------|
| <b>Age(y)</b>              |                     |
| 20-29                      | 3                   |
| 30-39                      | 5                   |
| 40-49                      | 5                   |
| 50-59                      | 4                   |
| ≥60                        | 3                   |
| <b>Gender</b>              |                     |
| Male                       | 7                   |
| Female                     | 13                  |
| <b>Terminal degree</b>     |                     |
| PhD                        | 3                   |
| Master                     | 9                   |
| Bachelor                   | 6                   |
| Others                     | 2                   |
| <b>Professional title</b>  |                     |
| Chief pharmacist           | 3                   |
| Associate chief pharmacist | 4                   |
| Pharmacist in charge       | 6                   |
| Pharmacist                 | 5                   |
| No title (e.g. Intern)     | 1                   |
| others                     | 1                   |
| <b>Years of experience</b> |                     |
| Less than 5                | 5                   |
| 6-10                       | 5                   |
| 11-20                      | 6                   |
| 21-30                      | 3                   |
| More than 30               | 1                   |

Table S2. Data of the pilot study.

|                                        |             |
|----------------------------------------|-------------|
| Total score of knowledge (Mean ± SD)   | 3.85 ± 1.04 |
| Total score of perceptions (Mean ± SD) | 40.2 ± 5.16 |
| Cronbach's alpha value for perceptions | 0.732       |

**Supplemental file 2****Knowledge, Perceptions and Practices of Pharmacists Regarding Generic Drugs  
in China****Part I: Demographic characteristics**

1. What is your occupation?
  - A. Pharmacist
  - B. Other: \_\_\_\_\_
2. Which of the following range does your age fall in?
  - A. 20-29 years old
  - B. 30-39 years old
  - C. 40-49 years old
  - D. 50-59 years old
  - E. Over 60 years old
3. What is your gender?
  - A. Male
  - B. Female
4. What is your terminal education degree?
  - A. PhD
  - B. Master degree
  - C. Bachelor degree
  - D. Others
5. What is your secondary department?
  - A. Outpatient pharmacy
  - B. Inpatient pharmacy
  - C. Emergency Pharmacy
  - C. Pharmacy storage
  - D. Clinical pharmacy
  - E. Compounding room
  - F. Drug clinical trial institution / laboratory
  - G. Other: \_\_\_\_\_
6. What is your professional title?
  - A. Chief pharmacist
  - B. Associate chief pharmacist
  - C. Pharmacist in charge

- 1  
2  
3  
4 D. Pharmacist  
5 E. No title (e.g. Intern)  
6  
7 F. Other: \_\_\_\_\_  
8

9 7. By the end of March 2020, how many years have you worked as a pharmacist?

- 10 A. Less than 5 years  
11 B. 6-10 years  
12 C. 11-20 years  
13 D. 21-30 years  
14  
15 E. Over 30 years  
16  
17

18 8. Where are you from?

19 City \_\_\_\_\_, Province \_\_\_\_\_  
20  
21

22 9. What is the level of your medical institution?

- 23 A. Tertiary hospital  
24 B. Secondary hospital  
25 C. Community hospital  
26 D. Primary healthcare institutions (including community health service center, township  
27 health center, village health office, clinics)  
28  
29  
30  
31  
32

## 33 Part II: Knowledge of generic drugs

34 10. Were you aware that China carries out the program of quality and efficacy consistency  
35 evaluation of generic drugs? (hereinafter referred to as "Consistency Evaluation")?  
36

- 37 A. Yes  
38 B. No  
39 C. Unsure  
40  
41  
42

43 11. Were you aware of the logo "Have passed the Consistency Evaluation" on the generic  
44 products?  
45

- 46 A. Yes  
47 B. No  
48 C. Unsure  
49  
50  
51

52 12. For the standard criteria of bioequivalence, please judge whether the following statements  
53 are correct or not.  
54

55 *In principle, the method of bioequivalence tests in vivo is used for Consistency*  
56 *Evaluation. The standard of bioequivalence is that the 90% confidence interval of the*  
57 *geometric mean experiment/ reference ratios for main pharmacokinetic parameters*  
58  
59  
60

(Cmax and AUC) falls entirely within the range of 90.00% ~ 120.00%.

- A. True
- B. False
- C. Unsure

13. Were you aware that all the generic drugs in national centralized procurement have passed the consistency evaluation of quality and efficacy?

- A. Yes
- B. No
- C. Unsure

14. Please judge whether the following statement is correct or not.

*The generic drugs in the national centralized procurement have the same active ingredients, dosage forms, routes of administration and therapeutic effects with the brand drugs.*

- A. True
- B. False
- C. Unsure

### Part III: Perceptions of generic substitution

15. Generic drugs that have passed the consistency evaluation are as effective as brand-name equivalents.

Strongly agree  Agree  Neutral  Disagree  Strongly disagree

16. Generic drugs that have passed the consistency evaluation are as safe as brand-name equivalents.

Strongly agree  Agree  Neutral  Disagree  Strongly disagree

17. Generic drugs that have passed the consistency evaluation are less expensive than brand-name equivalents.

Strongly agree  Agree  Neutral  Disagree  Strongly disagree

18. Generic drugs that have passed the consistency evaluation are interchangeable with brand-name drugs.

Strongly agree  Agree  Neutral  Disagree  Strongly disagree

19. Replacing brand-name drugs with generic drugs that passed the consistency evaluation may change the clinical outcomes of medication treatment.

Strongly agree  Agree  Neutral  Disagree  Strongly disagree

20. Application of generic drugs that passed the consistency evaluation could improve

1  
2  
3  
4 adherence to medication treatment of patients.

5  Strongly agree  Agree  Neutral  Disagree  Strongly disagree

6  
7 21. Health providers need to explain detailed information about generic drugs to patients in  
8 order to ensure that they correctly understand and use generic drugs.

9  
10  Strongly agree  Agree  Neutral  Disagree  Strongly disagree

11  
12 22. Generic drugs can be exempted from clinical trials for approval if they passed  
13 bioequivalence trials in vivo.

14  
15  Strongly agree  Agree  Neutral  Disagree  Strongly disagree

16  
17 23. Relevant organizations should formulate and issue standard guidelines for generic  
18 substitution.

19  
20  Strongly agree  Agree  Neutral  Disagree  Strongly disagree

21  
22 24. I support the current policy of substituting brand-name drugs with generic drugs that have  
23 passed the consistency evaluation.

24  
25  Strongly agree  Agree  Neutral  Disagree  Strongly disagree

26  
27  
28 **Part IV: Practices of generic substitution**

29  
30 25. How has the amount of generic drugs used in your medical institution changed after the  
31 implementation of national centralized procurement of drugs?

32  
33 A. Significantly increased

34  
35 B. Increased somewhat

36  
37 C. Basically unchanged

38  
39 D. Decreased

40  
41 E. Unsure

42  
43 26. What factors do you think affect the selection of generic drugs? Please select the top 3  
44 important items.

45  National policies and hospital regulations

46  Efficacy of generic drugs

47  Safety of generic drugs

48  Economy of generic drugs

49  Accessibility of generic drugs and brand-name drugs

50  Physicians clinical expertise in medication treatment

51  Patients financial burden

52  Patients willingness and preferences

53  Promotion of drug representatives

Reputation of generic drugs manufacturers

Other: \_\_\_\_\_

27. What factors do you think affect patients' choice of selecting generic drugs in the national centralized procurement? Please select the top 3 important items.

Patients preference for brand-name drugs and medication habits

Efficacy of generic drugs

Safety of generic drugs

Out-of-pockets cost of drugs

Patients financial burden

Physicians suggestions

National policies

Other: \_\_\_\_\_

28. What do you think is the largest challenge in implementing the national centralized procurement and use of generic drugs? Please select the top 3 important items.

There is not enough time to explain details to patients.

It is difficult to change patients preference.

Lack of trust in the efficacy and safety of generic drugs.

There is an increased risk of errors in dispensing drugs.

There is an increased cost in maintenance and manpower.

Other: \_\_\_\_\_

29. What measures should be taken to promote the national centralized procurement and use of generic drugs? Please select the top 3 important items.

Encourage patients to use generic drugs by use of health insurance policies.

Increase publicity of centralized procurement policies.

Educate health providers on centralized procurement policies and information about selected drugs.

Medical institutions should restrict the use of the brand-name drugs with the same generic name, and retain only the selected generic drugs.

Medical institutions should restrict the use of all brand-name drugs with the same pharmacological action.

Standard guidelines on generic substitution should be issued.

Other: \_\_\_\_\_

That's all. Thank you very much for the participation!



## Supplemental file 3.

Table S3 Association between pharmacists' knowledge and demographic characteristics.

| Statement                                                                                                                                                                                                     | Yes or Correct response N (%) | No or Incorrect response N (%) | Unsure N (%) | Age (P-value) * | Terminal Degree (P-value) * | Years of experience (P-value) * | Professional title (P-value) * | Gender (P-value) † | Location (P-value) † | Medical Institution (P-value) † |
|---------------------------------------------------------------------------------------------------------------------------------------------------------------------------------------------------------------|-------------------------------|--------------------------------|--------------|-----------------|-----------------------------|---------------------------------|--------------------------------|--------------------|----------------------|---------------------------------|
| Were you aware that China carries out the program of quality and efficacy consistency evaluation of generic drugs?                                                                                            | 2118 (92.4)                   | 74 (3.2)                       | 99 (4.3)     | 0.142           | <b>0.000</b>                | 0.447                           | <b>0.000</b>                   | 0.155              | <b>0.026</b>         | 0.794                           |
| Were you aware of the logo "Have passed the Consistency Evaluation" on the generic products?                                                                                                                  | 1718 (75.0)                   | 320 (14.0)                     | 253 (11.0)   | <b>0.010</b>    | 0.129                       | 0.070                           | 0.068                          | <b>0.020</b>       | <b>0.000</b>         | 0.450                           |
| True/False: In principle, the method of bioequivalence tests in vivo is used for Consistency Evaluation. The standard of bioequivalence is that the 90% confidence interval of the geometric mean experiment/ | 225 (9.8)                     | 1666 (72.7)                    | 400 (17.5)   | 0.052           | 0.164                       | 0.734                           | 0.096                          | 0.251              | <b>0.000</b>         | 0.254                           |

1  
2  
3  
4  
5  
6  
7  
8  
9  
10  
11  
12  
13  
14  
15  
16  
17  
18  
19  
20  
21  
22  
23  
24  
25  
26  
27  
28  
29  
30  
31  
32  
33  
34  
35  
36  
37  
38  
39  
40  
41  
42  
43  
44  
45  
46

reference ratios for main pharmacokinetic parameters (Cmax and AUC) falls entirely within the range of 90.00% ~ 120.00%.

|                                                                                                                                                                                              |                |             |              |       |       |       |              |       |              |       |
|----------------------------------------------------------------------------------------------------------------------------------------------------------------------------------------------|----------------|-------------|--------------|-------|-------|-------|--------------|-------|--------------|-------|
| Were you aware that all the generic drugs in national centralized procurement have passed the consistency evaluation of quality and efficacy?                                                | 2067<br>(90.2) | 68<br>(3.0) | 156<br>(6.8) | 0.094 | 0.153 | 0.076 | <b>0.001</b> | 0.097 | <b>0.003</b> | 0.449 |
| True/False: The generic drugs in the national centralized procurement have the same active ingredients, dosage forms, routes of administration and therapeutic effects with the brand drugs. | 2078<br>(90.7) | 57<br>(2.5) | 156<br>(6.8) | 0.338 | 0.104 | 0.467 | <b>0.046</b> | 0.213 | <b>0.047</b> | 0.108 |

Bold *P*-values represent statistical significance.

\* *P*-value calculated using Kruskal-Wallis test.

† *P*-value calculated using Chi-square.

**Table S4 Association between pharmacists' perceptions and demographic characteristics.**

| Statement                                                                                                                | Strongly Agree<br>N (%) | Agree<br>N (%) | Neutral<br>N (%) | Disagree<br>N (%) | Strongly Disagree<br>N (%) | Agree<br>(P-value)<br>* | Gender<br>(P-value)<br>† | Terminal Degree<br>(P-value)<br>* | Years of experience<br>(P-value)<br>* | Location<br>(P-value)<br>* | Professional title<br>(P-value)<br>* | Medical institution<br>(P-value)<br>* |
|--------------------------------------------------------------------------------------------------------------------------|-------------------------|----------------|------------------|-------------------|----------------------------|-------------------------|--------------------------|-----------------------------------|---------------------------------------|----------------------------|--------------------------------------|---------------------------------------|
| Generic drugs that have passed the consistency evaluation are as effective as brand-name equivalents.                    | 361<br>(15.8)           | 1179<br>(51.5) | 684<br>(29.9)    | 58<br>(2.5)       | 9<br>(0.4)                 | 0.752                   | <b>0.000</b>             | <b>0.000</b>                      | 0.400                                 | <b>0.001</b>               | <b>0.004</b>                         | 0.582                                 |
| Generic drugs that have passed the consistency evaluation are as safe as brand-name equivalents.                         | 355<br>(15.5)           | 1226<br>(53.5) | 657<br>(28.7)    | 50<br>(2.2)       | 3<br>(0.1)                 | 0.572                   | <b>0.001</b>             | <b>0.000</b>                      | 0.441                                 | 0.269                      | <b>0.016</b>                         | 0.554                                 |
| Generic drugs that have passed the consistency evaluation are less expensive than brand-name equivalents.                | 1076<br>(47.0)          | 987<br>(43.1)  | 218 (9.5)        | 10<br>(0.4)       | 0<br>(0.0)                 | 0.312                   | <b>0.030</b>             | <b>0.000</b>                      | 0.464                                 | 0.108                      | 0.131                                | 0.099                                 |
| Generic drugs that have passed the consistency evaluation are interchangeable with brand-name drugs.                     | 314<br>(13.7)           | 1085<br>(47.4) | 784<br>(34.2)    | 96<br>(4.2)       | 12<br>(0.5)                | 0.074                   | <b>0.000</b>             | <b>0.000</b>                      | 0.050                                 | <b>0.000</b>               | 0.188                                | 0.131                                 |
| Replacing brand-name drugs with generic drugs that passed the consistency evaluation may change the clinical outcomes of | 53<br>(2.3)             | 387<br>(16.9)  | 1047<br>(45.7)   | 615 (26.8)        | 189<br>(8.2)               | <b>0.000</b>            | <b>0.002</b>             | 0.062                             | <b>0.001</b>                          | <b>0.000</b>               | <b>0.000</b>                         | 0.190                                 |

1  
2  
3  
4

5 medication treatment.\*

6

7 Application of generic drugs  
8 that passed the consistency  
9 evaluation could improve  
10 adherence to medication  
11 treatment of patients.

|        |        |        |           |       |       |              |              |              |              |              |       |
|--------|--------|--------|-----------|-------|-------|--------------|--------------|--------------|--------------|--------------|-------|
| 228    | 873    | 1005   | 169 (7.4) | 16    | 0.029 | <b>0.022</b> | <b>0.002</b> | <b>0.037</b> | <b>0.042</b> | <b>0.003</b> | 0.204 |
| (10.0) | (38.1) | (43.9) |           | (0.7) |       |              |              |              |              |              |       |

12

13 Health providers need to  
14 explain detailed information  
15 about generic drugs to  
16 patients in order to ensure  
17 that they correctly  
18 understand and use generic  
19 drugs.

|        |        |        |       |       |       |              |              |       |       |       |       |
|--------|--------|--------|-------|-------|-------|--------------|--------------|-------|-------|-------|-------|
| 640    | 1369   | 258    | 20    | 4     | 0.415 | <b>0.033</b> | <b>0.028</b> | 0.167 | 0.143 | 0.119 | 0.151 |
| (27.9) | (59.8) | (11.3) | (0.9) | (0.2) |       |              |              |       |       |       |       |

20

21 Generic drugs can be  
22 exempted from clinical trials  
23 for approval if they passed  
24 bioequivalence trials in vivo.

|       |        |        |            |       |       |              |              |       |              |       |              |
|-------|--------|--------|------------|-------|-------|--------------|--------------|-------|--------------|-------|--------------|
| 191   | 510    | 759    | 673 (29.4) | 158   | 0.075 | <b>0.024</b> | <b>0.001</b> | 0.128 | <b>0.002</b> | 0.593 | <b>0.034</b> |
| (8.3) | (22.3) | (33.1) |            | (6.9) |       |              |              |       |              |       |              |

25

26 Relevant organizations  
27 should formulate and issue  
28 standard guidelines for  
29 generic substitution.

|        |        |        |       |       |       |       |              |       |              |              |       |
|--------|--------|--------|-------|-------|-------|-------|--------------|-------|--------------|--------------|-------|
| 661    | 1312   | 296    | 20    | 2     | 0.503 | 0.051 | <b>0.000</b> | 0.415 | <b>0.033</b> | <b>0.005</b> | 0.217 |
| (28.9) | (57.3) | (12.9) | (0.9) | (0.1) |       |       |              |       |              |              |       |

30

31 I support the current policy  
32 of substituting brand-name  
33 drugs with generic drugs that  
34 have passed the consistency  
35 evaluation.

|        |        |        |       |       |       |              |       |       |              |       |              |
|--------|--------|--------|-------|-------|-------|--------------|-------|-------|--------------|-------|--------------|
| 409    | 1225   | 619    | 32    | 6     | 0.135 | <b>0.000</b> | 0.051 | 0.410 | <b>0.000</b> | 0.662 | <b>0.026</b> |
| (17.9) | (53.5) | (27.0) | (1.4) | (0.3) |       |              |       |       |              |       |              |

36

37 **Bold P-values represent statistical significance.**

38

39

40

41

42

43

44

45

46

1  
2  
3  
4  
5 † P-value calculated using Mann-Whitney U test.  
6  
7  
8  
9  
10  
11  
12  
13  
14  
15  
16  
17  
18  
19  
20  
21  
22  
23  
24  
25  
26  
27  
28  
29  
30  
31  
32  
33  
34  
35  
36  
37  
38  
39  
40  
41  
42  
43  
44  
45  
46

For peer review only

1  
2  
3  
4  
5  
6  
7  
8  
9  
10  
11  
12  
13  
14  
15  
16  
17  
18  
19  
20  
21  
22  
23  
24  
25  
26  
27  
28  
29  
30  
31  
32  
33  
34  
35  
36  
37  
38  
39  
40  
41  
42  
43  
44  
45  
46

**Table S5 Crosstabs between support for generic substitution and locations.**

| <b>N (%)</b>     | <b>Beijing</b>  | <b>Tianjin</b>  | <b>Shanghai</b> | <b>Chongqing</b> | <b>Shenyang</b> | <b>Dalian</b>   | <b>Xiamen</b>  | <b>Guangzhou</b> | <b>Shenzhen</b> | <b>Chengdu</b> | <b>Xi-an</b>    | <b>Total</b>     |
|------------------|-----------------|-----------------|-----------------|------------------|-----------------|-----------------|----------------|------------------|-----------------|----------------|-----------------|------------------|
| <b>Agreed</b>    | 423<br>(76.8%)  | 147<br>(77.4%)  | 95<br>(53.3%)   | 66<br>(64.7%)    | 127<br>(67.9%)  | 189<br>(72.4%)  | 71<br>(78.9%)  | 104<br>(65.4%)   | 191<br>(72.9%)  | 71<br>(71.7%)  | 150<br>(70.7%)  | 1634<br>(71.3%)  |
| <b>Neutral</b>   | 118<br>(21.4%)  | 43<br>(22.6%)   | 76<br>(42.7%)   | 34<br>(33.3%)    | 55<br>(29.4%)   | 70<br>(26.8%)   | 18<br>(20.0%)  | 52<br>(32.7%)    | 66<br>(25.2%)   | 26<br>(26.3%)  | 61<br>(28.8%)   | 619<br>(27.0%)   |
| <b>Disagreed</b> | 10<br>(1.8%)    | 0<br>(0.0%)     | 7<br>(4.0%)     | 2<br>(2.0%)      | 5<br>(2.7%)     | 2<br>(0.8%)     | 1<br>(1.1%)    | 3<br>(1.9%)      | 5<br>(1.9%)     | 2<br>(2.0%)    | 1<br>(0.5%)     | 38<br>(1.7%)     |
| <b>Total</b>     | 551<br>(100.0%) | 190<br>(100.0%) | 178<br>(100.0%) | 102<br>(100.0%)  | 187<br>(100.0%) | 261<br>(100.0%) | 90<br>(100.0%) | 159<br>(100.0%)  | 262<br>(100.0%) | 99<br>(100.0%) | 212<br>(100.0%) | 2291<br>(100.0%) |

STROBE Statement—Checklist of items that should be included in reports of *cross-sectional studies*

|                              | Item No | Recommendation                                                                                                                                                                                    | Page, Line Number                     |
|------------------------------|---------|---------------------------------------------------------------------------------------------------------------------------------------------------------------------------------------------------|---------------------------------------|
| <b>Title and abstract</b>    | 1       | (a) Indicate the study's design with a commonly used term in the title or the abstract                                                                                                            | Page1, line3-4                        |
|                              |         | (b) Provide in the abstract an informative and balanced summary of what was done and what was found                                                                                               | Page2, line2-25                       |
| <b>Introduction</b>          |         |                                                                                                                                                                                                   |                                       |
| Background/rationale         | 2       | Explain the scientific background and rationale for the investigation being reported                                                                                                              | Page3 to Page4, line20                |
| Objectives                   | 3       | State specific objectives, including any prespecified hypotheses                                                                                                                                  | Page4, line 18-20                     |
| <b>Methods</b>               |         |                                                                                                                                                                                                   |                                       |
| Study design                 | 4       | Present key elements of study design early in the paper                                                                                                                                           | Page4, line 22-26                     |
| Setting                      | 5       | Describe the setting, locations, and relevant dates, including periods of recruitment, exposure, follow-up, and data collection                                                                   | Page4, line 22 to Page5, line26       |
| Participants                 | 6       | (a) Give the eligibility criteria, and the sources and methods of selection of participants                                                                                                       | Page5, line30-34                      |
| Variables                    | 7       | Clearly define all outcomes, exposures, predictors, potential confounders, and effect modifiers. Give diagnostic criteria, if applicable                                                          | Page5, line1-21                       |
| Data sources/<br>measurement | 8*      | For each variable of interest, give sources of data and details of methods of assessment (measurement). Describe comparability of assessment methods if there is more than one group              | Page5, line1-21, Table1               |
| Bias                         | 9       | Describe any efforts to address potential sources of bias                                                                                                                                         | Page4, line28-40 and Page5, line25-29 |
| Study size                   | 10      | Explain how the study size was arrived at                                                                                                                                                         | Page5, line25-29                      |
| Quantitative variables       | 11      | Explain how quantitative variables were handled in the analyses. If applicable, describe which groupings were chosen and why                                                                      | Page5, line38-43                      |
| Statistical methods          | 12      | (a) Describe all statistical methods, including those used to control for confounding                                                                                                             | Page5, line38-43                      |
|                              |         | (b) Describe any methods used to examine subgroups and interactions                                                                                                                               | Table1, TableS5                       |
|                              |         | (c) Explain how missing data were addressed                                                                                                                                                       | Page5, line25-26                      |
|                              |         | (d) If applicable, describe analytical methods taking account of sampling strategy                                                                                                                | Page5, line38-43                      |
|                              |         | (e) Describe any sensitivity analyses                                                                                                                                                             | NA                                    |
| <b>Results</b>               |         |                                                                                                                                                                                                   |                                       |
| Participants                 | 13*     | (a) Report numbers of individuals at each stage of study—eg numbers potentially eligible, examined for eligibility, confirmed eligible, included in the study, completing follow-up, and analysed | Page5, line30-34                      |
|                              |         | (b) Give reasons for non-participation at each stage                                                                                                                                              | Page5, line30-34                      |
|                              |         | (c) Consider use of a flow diagram                                                                                                                                                                | NA                                    |
| Descriptive data             | 14*     | (a) Give characteristics of study participants (eg demographic,                                                                                                                                   | Page6, line1-9 and                    |

|                          |     |                                                                                                                                                                                                              |                                  |
|--------------------------|-----|--------------------------------------------------------------------------------------------------------------------------------------------------------------------------------------------------------------|----------------------------------|
|                          |     | clinical, social) and information on exposures and potential confounders                                                                                                                                     | Table1                           |
|                          |     | (b) Indicate number of participants with missing data for each variable of interest                                                                                                                          | Page5, line25-26                 |
| Outcome data             | 15* | Report numbers of outcome events or summary measures                                                                                                                                                         | Page9-15 (Table2,3,4)            |
| Main results             | 16  | (a) Give unadjusted estimates and, if applicable, confounder-adjusted estimates and their precision (eg, 95% confidence interval). Make clear which confounders were adjusted for and why they were included | Table1                           |
|                          |     | (b) Report category boundaries when continuous variables were categorized                                                                                                                                    | Table1                           |
|                          |     | (c) If relevant, consider translating estimates of relative risk into absolute risk for a meaningful time period                                                                                             | NA                               |
| Other analyses           | 17  | Report other analyses done—eg analyses of subgroups and interactions, and sensitivity analyses                                                                                                               | Table1, Table S5                 |
| <b>Discussion</b>        |     |                                                                                                                                                                                                              |                                  |
| Key results              | 18  | Summarise key results with reference to study objectives                                                                                                                                                     | Page16, line8-14                 |
| Limitations              | 19  | Discuss limitations of the study, taking into account sources of potential bias or imprecision. Discuss both direction and magnitude of any potential bias                                                   | Page18, line22-32                |
| Interpretation           | 20  | Give a cautious overall interpretation of results considering objectives, limitations, multiplicity of analyses, results from similar studies, and other relevant evidence                                   | Page16, line15 to Page18, line21 |
| Generalisability         | 21  | Discuss the generalisability (external validity) of the study results                                                                                                                                        | Page18, line22-42                |
| <b>Other information</b> |     |                                                                                                                                                                                                              |                                  |
| Funding                  | 22  | Give the source of funding and the role of the funders for the present study and, if applicable, for the original study on which the present article is based                                                | Page19, line 12-14               |

\*Give information separately for exposed and unexposed groups.

**Note:** An Explanation and Elaboration article discusses each checklist item and gives methodological background and published examples of transparent reporting. The STROBE checklist is best used in conjunction with this article (freely available on the Web sites of PLoS Medicine at <http://www.plosmedicine.org/>, Annals of Internal Medicine at <http://www.annals.org/>, and Epidemiology at <http://www.epidem.com/>). Information on the STROBE Initiative is available at [www.strobe-statement.org](http://www.strobe-statement.org).
